# Supplementary material for: Comprehensive Analysis of Expression Regulation for RNA m6A Regulators With Clinical Significance in Human Cancers
Source: Front Oncol. 2021 Feb 23;11:624395. doi: 10.3389/fonc.2021.624395 (PMC7946859; doi:10.3389/fonc.2021.624395)
Supplement: Supplementary file 2 [file DataSheet_2.xlsx]

## Sheet: Table S1
Table S1. Statistics of cancer types and sampling sizes.
cancer	mRNA_N	mRNA_T	miRNA_N	miRNA_T	methylation_N	methylation_T
THCA	59	501	59	502	54	498
BRCA	112	1093	87	755	82	774
HNSC	44	520	44	486	45	523
KICH	25	66	25	66	0	264
KIRC	72	533	71	254	160	316
KIRP	32	290	34	291	45	274
COAD	41	285	0	220	38	292
LIHC	50	371	50	372	50	375
STAD	35	415	41	389	2	393
LUAD	59	515	46	450	32	455
LUSC	51	501	45	342	41	365
PRAD	52	497	52	494	49	484
UCEC	25	176	32	411	46	425

## Sheet: Table S2
Table S2. Expression median value in four cancer stages.
geneID	stage I_median	stage II_median	stage III_median	stage IV_median	cancer
METTL3	9.33981	9.35139	9.39447	9.33998	BRCA
METTL14	8.49325	8.48068	8.50359	8.26836	BRCA
WTAP	10.6774	10.595	10.6111	10.4617	BRCA
KIAA1429	11.1567	11.1127	11.2337	10.917	BRCA
CBLL1	9.71077	9.62586	9.58344	9.49901	BRCA
RBM15	7.40447	7.43116	7.34173	7.42761	BRCA
RBM15B	11.0566	10.9789	10.965	10.9235	BRCA
ZC3H13	10.7315	10.7137	10.6676	10.4819	BRCA
FTO	10.1443	10.0377	10.0514	9.98959	BRCA
ALKBH5	10.986	11.0357	10.9995	10.997	BRCA
HNRNPC	13.3972	13.4097	13.3776	13.2749	BRCA
HNRNPA2B1	13.7854	13.8997	13.8789	13.9939	BRCA
YTHDF1	10.5804	10.653	10.6261	10.7473	BRCA
YTHDF2	11.1205	11.1048	11.0674	11.0662	BRCA
YTHDF3	10.9455	10.8998	10.9888	10.6364	BRCA
YTHDC1	10.802	10.7866	10.7804	10.6493	BRCA
YTHDC2	9.7877	9.73716	9.73067	9.41188	BRCA
IGF2BP1	1.27785	1.3596	1.17256	1.76973	BRCA
IGF2BP2	5.04212	5.0431	4.89386	5.57295	BRCA
IGF2BP3	2.88547	3.11218	2.89596	2.8848	BRCA
EIF3A	12.5376	12.552	12.4611	12.4983	BRCA
METTL3	9.01702	8.94518	9.15268	9.10458	HNSC
METTL14	8.01797	8.02852	7.84747	7.92384	HNSC
WTAP	10.7527	10.8821	10.9954	10.9794	HNSC
KIAA1429	10.7187	10.5303	10.5465	10.6162	HNSC
CBLL1	9.16797	9.16192	9.1279	9.10439	HNSC
RBM15	7.75117	7.85423	7.75252	7.93475	HNSC
RBM15B	10.9475	10.7391	10.6639	10.7285	HNSC
ZC3H13	10.3544	10.3539	10.2118	10.3373	HNSC
FTO	9.65191	9.65492	9.56648	9.77743	HNSC
ALKBH5	11.0709	11.1037	11.087	11.1742	HNSC
HNRNPC	13.0044	13.0627	13.0636	13.1409	HNSC
HNRNPA2B1	13.6552	13.8561	13.8957	13.9252	HNSC
YTHDF1	10.7188	10.7183	10.638	10.6896	HNSC
YTHDF2	11.0122	11.126	10.9826	11.0165	HNSC
YTHDF3	10.9607	10.8043	10.8152	10.7061	HNSC
YTHDC1	10.4689	10.4495	10.4181	10.44	HNSC
YTHDC2	9.38809	9.26147	9.34064	9.16917	HNSC
IGF2BP1	4.53282	4.72982	4.75661	5.32939	HNSC
IGF2BP2	10.2185	10.5366	10.7093	10.5891	HNSC
IGF2BP3	8.28632	8.71296	8.65424	9.0767	HNSC
EIF3A	13.0486	12.8529	12.8727	12.941	HNSC
METTL3	9.20406	9.47714	9.37316	9.42859	KICH
METTL14	8.50526	8.32808	8.50783	8.33717	KICH
WTAP	9.72937	9.50454	9.48982	9.97319	KICH
KIAA1429	9.76214	10.019	10.1142	10.9362	KICH
CBLL1	9.70602	9.77351	9.49737	10.1253	KICH
RBM15	6.78911	6.56186	6.3309	6.99248	KICH
RBM15B	10.8895	10.9585	10.6812	10.5859	KICH
ZC3H13	10.1031	9.89131	9.96008	10.0482	KICH
FTO	9.46604	9.274	9.39066	9.25529	KICH
ALKBH5	10.8409	11.022	11.0718	10.9078	KICH
HNRNPC	12.2718	12.2723	12.1982	12.4023	KICH
HNRNPA2B1	13.2729	13.2861	13.2876	13.4343	KICH
YTHDF1	10.4601	10.5709	10.4283	10.5326	KICH
YTHDF2	10.3723	10.1414	10.1611	10.2403	KICH
YTHDF3	11.1024	11.1167	11.2359	11.5444	KICH
YTHDC1	10.342	10.2978	10.1579	10.2695	KICH
YTHDC2	9.56308	9.41841	9.38251	9.62939	KICH
IGF2BP1	0.469157	2.02765	1.18595	2.60995	KICH
IGF2BP2	8.55409	8.70384	8.8046	8.79401	KICH
IGF2BP3	4.4344	4.50177	4.77336	7.99037	KICH
EIF3A	11.9233	11.8423	11.7798	12.2102	KICH
METTL3	8.77646	8.8259	8.67845	8.92864	KIRC
METTL14	8.41918	8.34103	8.19202	8.01927	KIRC
WTAP	10.7103	10.7328	10.8148	10.8132	KIRC
KIAA1429	10.363	10.3446	10.2595	10.3348	KIRC
CBLL1	9.34472	9.28153	9.28076	9.1951	KIRC
RBM15	7.29067	7.16311	7.23412	7.30033	KIRC
RBM15B	10.1293	10.0419	10.0229	10.0478	KIRC
ZC3H13	10.502	10.4609	10.3657	10.3055	KIRC
FTO	11.2441	11.1188	11.1941	11.2066	KIRC
ALKBH5	11.5927	11.4648	11.5861	11.623	KIRC
HNRNPC	12.9097	13.0207	12.9176	13.0046	KIRC
HNRNPA2B1	13.2902	13.4205	13.3554	13.4292	KIRC
YTHDF1	10.1165	10.0391	10.1238	10.1411	KIRC
YTHDF2	10.6393	10.5691	10.6564	10.6811	KIRC
YTHDF3	10.8858	10.8843	10.8402	10.8264	KIRC
YTHDC1	10.7347	10.7357	10.6264	10.5317	KIRC
YTHDC2	9.87331	9.90769	9.96153	9.83378	KIRC
IGF2BP1	6.18431	4.44934	6.70775	6.37221	KIRC
IGF2BP2	4.40375	4.39298	4.71183	5.80871	KIRC
IGF2BP3	3.76946	4.11504	4.30207	6.53286	KIRC
EIF3A	12.3118	12.2118	12.0394	12.0086	KIRC
METTL3	9.08249	8.85449	8.84112	8.59504	KIRP
METTL14	7.72706	7.75661	7.74725	7.50533	KIRP
WTAP	10.2498	10.493	10.2731	10.5567	KIRP
KIAA1429	9.42139	9.6613	9.72147	9.79054	KIRP
CBLL1	8.94871	8.8938	9.01516	9.089	KIRP
RBM15	6.87293	6.77364	7.0376	6.76633	KIRP
RBM15B	10.7835	10.6438	10.6226	10.7782	KIRP
ZC3H13	10.0156	9.85679	9.95155	9.82567	KIRP
FTO	10.5446	10.6502	10.5073	10.3156	KIRP
ALKBH5	11.3494	11.2254	11.2174	11.1709	KIRP
HNRNPC	12.8572	12.8779	12.9733	13.2112	KIRP
HNRNPA2B1	13.5744	13.5927	13.5158	13.673	KIRP
YTHDF1	10.4368	10.3474	10.4668	10.4098	KIRP
YTHDF2	10.3594	10.3206	10.4664	10.3188	KIRP
YTHDF3	10.2145	10.3389	10.3522	10.3569	KIRP
YTHDC1	10.5825	10.4781	10.5508	10.502	KIRP
YTHDC2	9.22452	9.19391	9.22206	9.067	KIRP
IGF2BP1	6.26168	6.81134	6.7407	6.3764	KIRP
IGF2BP2	9.29478	9.26525	8.79378	9.61708	KIRP
IGF2BP3	3.50867	3.81942	4.02863	6.45375	KIRP
EIF3A	12.0903	12.0743	12.1029	12.277	KIRP
METTL3	9.02186	9.09084	9.05883	8.59018	LIHC
METTL14	7.99316	7.84042	7.95841	7.96699	LIHC
WTAP	10.0381	10.1027	10.0576	10.1077	LIHC
KIAA1429	10.3336	10.3687	10.4206	9.96497	LIHC
CBLL1	8.90006	8.8966	9.02336	9.05814	LIHC
RBM15	7.23441	7.43906	7.23604	7.04417	LIHC
RBM15B	10.3526	10.4101	10.4607	10.3044	LIHC
ZC3H13	9.6891	9.59491	9.73178	9.43648	LIHC
FTO	9.23592	9.22363	9.36364	8.7693	LIHC
ALKBH5	11.1352	10.8835	10.9349	11.1709	LIHC
HNRNPC	13.0148	13.0763	13.0291	12.9717	LIHC
HNRNPA2B1	13.5871	13.7088	13.6793	13.2246	LIHC
YTHDF1	10.3243	10.3733	10.5431	10.6327	LIHC
YTHDF2	10.4373	10.5272	10.4909	10.5282	LIHC
YTHDF3	10.7855	10.7842	10.8624	10.8149	LIHC
YTHDC1	9.932	9.935	10.037	9.93702	LIHC
YTHDC2	9.28191	9.2584	9.2305	9.16348	LIHC
IGF2BP1	6.96601	7.01789	6.95567	7.70361	LIHC
IGF2BP2	7.90191	8.11853	8.42766	7.67963	LIHC
IGF2BP3	5.2901	6.50272	6.42311	5.71811	LIHC
EIF3A	12.2642	12.2881	12.2371	12.139	LIHC
METTL3	9.3425	9.19394	9.2429	9.3304	LUAD
METTL14	8.08417	8.05474	7.93365	8.08531	LUAD
WTAP	10.5452	10.5298	10.5149	10.7122	LUAD
KIAA1429	10.3291	10.4347	10.451	10.5927	LUAD
CBLL1	9.08855	9.13049	9.13312	9.32786	LUAD
RBM15	7.3698	7.41425	7.30208	7.40204	LUAD
RBM15B	10.812	10.7608	10.8065	10.7477	LUAD
ZC3H13	10.1917	10.2083	10.3038	10.2122	LUAD
FTO	9.71941	9.71957	9.73979	9.59796	LUAD
ALKBH5	11.0042	10.9713	10.9721	11.0274	LUAD
HNRNPC	13.0823	13.1277	13.092	13.3032	LUAD
HNRNPA2B1	13.6477	13.6484	13.7086	13.8275	LUAD
YTHDF1	10.6733	10.677	10.5951	10.6133	LUAD
YTHDF2	11.1153	11.0268	10.9685	11.1093	LUAD
YTHDF3	10.7495	10.7771	10.8219	11.0133	LUAD
YTHDC1	10.4913	10.4619	10.4093	10.505	LUAD
YTHDC2	9.1923	8.9974	9.07922	9.13003	LUAD
IGF2BP1	1.63867	2.50225	3.64318	2.85073	LUAD
IGF2BP2	8.40782	8.32425	8.70112	8.59776	LUAD
IGF2BP3	7.28123	8.25834	8.7622	7.3953	LUAD
EIF3A	12.3144	12.4667	12.4866	12.4141	LUAD
METTL3	9.15811	9.24661	9.18319	9.78161	LUSC
METTL14	7.78679	7.80695	7.81928	7.71037	LUSC
WTAP	11.083	11.0073	10.9888	11.1551	LUSC
KIAA1429	10.4393	10.3771	10.5804	10.6409	LUSC
CBLL1	9.35499	9.31859	9.37925	9.25242	LUSC
RBM15	7.49408	7.52995	7.4734	7.161	LUSC
RBM15B	10.6913	10.7373	10.5727	10.4905	LUSC
ZC3H13	10.1406	10.2103	9.87533	10.1952	LUSC
FTO	9.7632	9.6822	9.65286	10.0413	LUSC
ALKBH5	11.091	11.055	11.066	10.8214	LUSC
HNRNPC	13.2894	13.2747	13.3266	13.3857	LUSC
HNRNPA2B1	13.8255	13.9728	13.8294	13.6494	LUSC
YTHDF1	10.6384	10.6627	10.6125	10.7796	LUSC
YTHDF2	10.9685	10.8785	10.8549	10.753	LUSC
YTHDF3	10.7521	10.637	10.7714	10.5101	LUSC
YTHDC1	10.487	10.5096	10.3842	10.4859	LUSC
YTHDC2	9.03516	9.08747	8.9525	8.86407	LUSC
IGF2BP1	5.32118	5.84174	6.61709	5.28279	LUSC
IGF2BP2	10.5465	10.9518	10.5391	10.8386	LUSC
IGF2BP3	9.83496	9.93136	9.96601	8.56452	LUSC
EIF3A	12.4451	12.5436	12.441	12.7115	LUSC
METTL3	9.43997	9.38928	9.39031	9.45673	THCA
METTL14	8.40374	8.35974	8.41164	8.31607	THCA
WTAP	10.6852	10.5473	10.6677	10.6507	THCA
KIAA1429	10.0135	10.0544	9.99974	9.98277	THCA
CBLL1	9.11447	9.24338	9.04587	9.02991	THCA
RBM15	6.791	6.75606	6.72609	6.72545	THCA
RBM15B	10.8531	10.8545	10.8408	10.8588	THCA
ZC3H13	10.6273	10.6108	10.5338	10.5597	THCA
FTO	9.93961	10.0468	9.96484	9.95152	THCA
ALKBH5	11.1991	11.3329	11.2148	11.2042	THCA
HNRNPC	13.0907	12.9658	13.0839	13.1671	THCA
HNRNPA2B1	13.57	13.5791	13.5313	13.5377	THCA
YTHDF1	10.4371	10.4804	10.4893	10.4394	THCA
YTHDF2	10.6292	10.6255	10.6387	10.5798	THCA
YTHDF3	10.3923	10.3452	10.3575	10.3564	THCA
YTHDC1	10.7619	10.7015	10.7027	10.6195	THCA
YTHDC2	9.21507	9.18725	9.19929	9.1037	THCA
IGF2BP1	-1.46037	-1.49046	-1.27199	-1.33882	THCA
IGF2BP2	10.1822	10.0574	10.2673	10.3793	THCA
IGF2BP3	4.36817	4.05489	4.33399	4.07801	THCA
EIF3A	12.4777	12.5667	12.4467	12.4547	THCA
METTL3	9.27046	9.1929	9.07184	9.08496	COAD
METTL14	8.01759	7.91514	7.89051	7.76453	COAD
WTAP	10.5784	10.5636	10.6105	10.5581	COAD
KIAA1429	10.342	10.2056	10.3316	10.5025	COAD
CBLL1	9.51514	9.44324	9.4619	9.5358	COAD
RBM15	7.56369	7.58037	7.56961	7.52913	COAD
RBM15B	11.1734	10.9974	11.0357	10.8438	COAD
ZC3H13	10.4514	10.5799	10.7343	10.89	COAD
FTO	9.12495	9.17072	9.24395	9.26763	COAD
ALKBH5	10.5246	10.5447	10.5854	10.4432	COAD
HNRNPC	13.1976	13.2818	13.2019	13.1817	COAD
HNRNPA2B1	14.1021	14.0735	14.1167	14.0303	COAD
YTHDF1	10.7481	10.832	10.9539	10.9431	COAD
YTHDF2	10.9569	10.8671	10.8139	10.757	COAD
YTHDF3	10.7507	10.5928	10.6797	10.7307	COAD
YTHDC1	10.392	10.4504	10.5403	10.5225	COAD
YTHDC2	9.41812	9.32637	9.20172	9.11252	COAD
IGF2BP1	1.4218	1.49922	2.59091	2.63486	COAD
IGF2BP2	10.0941	10.0495	10.0836	10.3869	COAD
IGF2BP3	4.47393	4.77095	5.46392	6.50215	COAD
EIF3A	12.9222	12.8032	12.8392	12.6375	COAD
METTL3	8.79903	8.70904	8.7827	8.92488	STAD
METTL14	7.98604	7.79683	7.87252	7.90775	STAD
WTAP	10.3598	10.3011	10.2704	10.3441	STAD
KIAA1429	10.4975	10.3533	10.4553	10.4231	STAD
CBLL1	9.617	9.50648	9.59568	9.66149	STAD
RBM15	8.59751	8.43699	8.63608	8.36358	STAD
RBM15B	11.0451	11.1195	11.0218	10.9883	STAD
ZC3H13	11.2429	11.4309	11.6265	11.2199	STAD
FTO	9.67179	9.79986	9.95027	9.9084	STAD
ALKBH5	10.8455	10.8884	10.9154	10.628	STAD
HNRNPC	12.5899	12.51	12.4963	12.5536	STAD
HNRNPA2B1	13.7365	13.7194	13.7538	13.6494	STAD
YTHDF1	10.923	10.802	10.8365	10.8708	STAD
YTHDF2	10.8026	10.7852	10.8114	10.6594	STAD
YTHDF3	11.2998	11.1028	11.1371	11.1747	STAD
YTHDC1	10.3856	10.3195	10.3683	10.2264	STAD
YTHDC2	9.37088	9.36125	9.49108	9.40777	STAD
IGF2BP1	3.32423	2.85541	2.99096	4.50906	STAD
IGF2BP2	9.87875	10.0712	10.1578	9.87377	STAD
IGF2BP3	7.35793	8.57993	8.19197	7.02591	STAD
EIF3A	12.698	12.6281	12.7308	12.6193	STAD

## Sheet: Table S3
Table S3. Pan-cancer miRNA-gene regulatory pairs with negative correlation.
geneID	mirna	logFC.T.N.mean.mirna	p-value.mirna	FDR.mirna	logFC.T.N.mean.gene	p-value.gene	FDR.gene	type
EIF3A	hsa-miR-362-5p	0.0498793	0.00428323	0.00571097	-0.281955	1.06793e-11	2.49183e-11	BRCA
EIF3A	hsa-miR-155-5p	1.45055	6.73847e-16	2.59912e-15	-0.281955	1.06793e-11	2.49183e-11	BRCA
EIF3A	hsa-miR-15a-5p	0.72509	5.60364e-15	1.95223e-14	-0.281955	1.06793e-11	2.49183e-11	BRCA
EIF3A	hsa-miR-340-5p	1.24061	1.73972e-20	8.94713e-20	-0.281955	1.06793e-11	2.49183e-11	BRCA
EIF3A	hsa-miR-182-5p	2.45398	3.92993e-38	8.48866e-37	-0.281955	1.06793e-11	2.49183e-11	BRCA
FTO	hsa-miR-150-5p	0.140486	1.4474e-05	2.36847e-05	-0.973137	6.07687e-39	6.38072e-38	BRCA
FTO	hsa-miR-155-5p	1.45055	6.73847e-16	2.59912e-15	-0.973137	6.07687e-39	6.38072e-38	BRCA
FTO	hsa-miR-3913-5p	0.79845	1.68948e-12	4.67855e-12	-0.973137	6.07687e-39	6.38072e-38	BRCA
FTO	hsa-miR-340-5p	1.24061	1.73972e-20	8.94713e-20	-0.973137	6.07687e-39	6.38072e-38	BRCA
FTO	hsa-miR-181a-5p	0.708402	7.04992e-11	1.73043e-10	-0.973137	6.07687e-39	6.38072e-38	BRCA
FTO	hsa-miR-181d-5p	1.04685	6.54555e-09	1.44269e-08	-0.973137	6.07687e-39	6.38072e-38	BRCA
FTO	hsa-miR-181b-5p	1.3671	2.48504e-24	1.6774e-23	-0.973137	6.07687e-39	6.38072e-38	BRCA
FTO	hsa-miR-181c-5p	0.716163	4.01792e-06	7.1137e-06	-0.973137	6.07687e-39	6.38072e-38	BRCA
FTO	hsa-miR-21-5p	2.18698	1.54493e-42	8.34263e-41	-0.973137	6.07687e-39	6.38072e-38	BRCA
FTO	hsa-miR-151a-3p	0.570907	3.89076e-06	7.00337e-06	-0.973137	6.07687e-39	6.38072e-38	BRCA
IGF2BP2	hsa-miR-200a-3p	2.13449	7.34809e-31	7.93593e-30	-0.510639	2.20852e-30	9.2758e-30	BRCA
IGF2BP2	hsa-miR-141-3p	2.3828	9.06439e-35	1.22369e-33	-0.510639	2.20852e-30	9.2758e-30	BRCA
METTL14	hsa-miR-1307-3p	0.948685	1.66348e-10	3.99235e-10	-0.341271	2.97802e-16	7.81731e-16	BRCA
METTL14	hsa-miR-3913-5p	0.79845	1.68948e-12	4.67855e-12	-0.341271	2.97802e-16	7.81731e-16	BRCA
WTAP	hsa-miR-425-5p	0.708221	7.00627e-07	1.30461e-06	-0.205172	4.1341e-11	8.68161e-11	BRCA
YTHDC1	hsa-miR-17-5p	0.93984	0.000151735	0.000234105	-0.168959	6.92747e-07	1.32252e-06	BRCA
YTHDC1	hsa-miR-15a-5p	0.72509	5.60364e-15	1.95223e-14	-0.168959	6.92747e-07	1.32252e-06	BRCA
YTHDC1	hsa-miR-16-5p	0.143876	0.000674586	0.000958622	-0.168959	6.92747e-07	1.32252e-06	BRCA
YTHDC1	hsa-miR-93-5p	1.09568	1.22824e-18	6.02955e-18	-0.168959	6.92747e-07	1.32252e-06	BRCA
YTHDC1	hsa-miR-181a-5p	0.708402	7.04992e-11	1.73043e-10	-0.168959	6.92747e-07	1.32252e-06	BRCA
YTHDC1	hsa-miR-19a-3p	1.06214	2.36569e-07	4.81003e-07	-0.168959	6.92747e-07	1.32252e-06	BRCA
YTHDC1	hsa-miR-222-3p	0.0479158	8.12225e-06	1.37063e-05	-0.168959	6.92747e-07	1.32252e-06	BRCA
YTHDC1	hsa-miR-106a-5p	0.725002	0.00147948	0.00204852	-0.168959	6.92747e-07	1.32252e-06	BRCA
YTHDC1	hsa-miR-20a-5p	0.77445	0.00757427	0.00973834	-0.168959	6.92747e-07	1.32252e-06	BRCA
YTHDC1	hsa-miR-103a-3p	0.77391	7.37781e-13	2.19433e-12	-0.168959	6.92747e-07	1.32252e-06	BRCA
YTHDC1	hsa-miR-129-5p	0.066656	1.06282e-11	2.79963e-11	-0.168959	6.92747e-07	1.32252e-06	BRCA
YTHDC1	hsa-miR-181b-5p	1.3671	2.48504e-24	1.6774e-23	-0.168959	6.92747e-07	1.32252e-06	BRCA
YTHDC1	hsa-miR-107	0.611395	7.51761e-13	2.19433e-12	-0.168959	6.92747e-07	1.32252e-06	BRCA
YTHDC1	hsa-miR-106b-5p	1.23499	2.40753e-24	1.6774e-23	-0.168959	6.92747e-07	1.32252e-06	BRCA
YTHDC1	hsa-miR-324-3p	0.640059	0.000251967	0.000372773	-0.168959	6.92747e-07	1.32252e-06	BRCA
YTHDC1	hsa-miR-20b-5p	0.849845	0.00281014	0.00379369	-0.168959	6.92747e-07	1.32252e-06	BRCA
YTHDC1	hsa-miR-221-3p	0.0275967	5.74455e-05	8.99147e-05	-0.168959	6.92747e-07	1.32252e-06	BRCA
HNRNPA2B1	hsa-miR-190a-5p	-0.875517	3.7838e-14	1.27703e-13	0.561678	2.66723e-40	5.60119e-39	BRCA
HNRNPA2B1	hsa-miR-204-5p	-2.25921	5.75347e-36	8.87678e-35	0.561678	2.66723e-40	5.60119e-39	BRCA
HNRNPA2B1	hsa-miR-195-5p	-1.31122	1.30246e-31	1.56295e-30	0.561678	2.66723e-40	5.60119e-39	BRCA
HNRNPA2B1	hsa-miR-326	-1.12151	3.83162e-16	1.53265e-15	0.561678	2.66723e-40	5.60119e-39	BRCA
HNRNPA2B1	hsa-miR-539-5p	-1.01194	2.43418e-12	6.57227e-12	0.561678	2.66723e-40	5.60119e-39	BRCA
HNRNPA2B1	hsa-miR-23a-3p	-0.11001	0.00114302	0.0016032	0.561678	2.66723e-40	5.60119e-39	BRCA
HNRNPA2B1	hsa-miR-140-3p	-0.933181	1.32617e-27	1.10174e-26	0.561678	2.66723e-40	5.60119e-39	BRCA
HNRNPA2B1	hsa-miR-197-3p	-0.295524	2.40502e-07	4.81003e-07	0.561678	2.66723e-40	5.60119e-39	BRCA
HNRNPC	hsa-miR-224-5p	-0.965105	2.53432e-17	1.09483e-16	0.475082	3.88813e-33	2.04127e-32	BRCA
HNRNPC	hsa-miR-139-3p	-2.98023	6.87053e-42	2.47339e-40	0.475082	3.88813e-33	2.04127e-32	BRCA
HNRNPC	hsa-miR-136-3p	-0.550869	6.01425e-07	1.13954e-06	0.475082	3.88813e-33	2.04127e-32	BRCA
HNRNPC	hsa-miR-505-5p	-0.469612	2.94074e-10	6.90435e-10	0.475082	3.88813e-33	2.04127e-32	BRCA
HNRNPC	hsa-miR-495-3p	-1.48113	7.26319e-29	6.53687e-28	0.475082	3.88813e-33	2.04127e-32	BRCA
HNRNPC	hsa-miR-299-5p	-1.24049	3.65924e-17	1.51999e-16	0.475082	3.88813e-33	2.04127e-32	BRCA
HNRNPC	hsa-miR-485-3p	-0.671368	8.9525e-09	1.93374e-08	0.475082	3.88813e-33	2.04127e-32	BRCA
HNRNPC	hsa-miR-218-5p	-0.898302	5.69101e-23	3.61547e-22	0.475082	3.88813e-33	2.04127e-32	BRCA
HNRNPC	hsa-miR-144-3p	-2.16009	5.18726e-13	1.60064e-12	0.475082	3.88813e-33	2.04127e-32	BRCA
IGF2BP1	hsa-let-7b-5p	-0.3675	2.69558e-08	5.70829e-08	3.76324	1.07206e-16	3.21617e-16	BRCA
IGF2BP1	hsa-let-7c-5p	-1.59598	4.09547e-36	7.37185e-35	3.76324	1.07206e-16	3.21617e-16	BRCA
IGF2BP1	hsa-miR-29a-3p	-0.587163	1.44423e-12	4.10465e-12	3.76324	1.07206e-16	3.21617e-16	BRCA
IGF2BP1	hsa-let-7a-5p	-0.200566	0.000523241	0.000753467	3.76324	1.07206e-16	3.21617e-16	BRCA
IGF2BP3	hsa-let-7a-5p	-0.200566	0.000523241	0.000753467	2.18609	0.0304829	0.0439763	BRCA
IGF2BP3	hsa-miR-655-3p	-0.917218	2.90841e-13	9.23847e-13	2.18609	0.0304829	0.0439763	BRCA
IGF2BP3	hsa-let-7c-5p	-1.59598	4.09547e-36	7.37185e-35	2.18609	0.0304829	0.0439763	BRCA
IGF2BP3	hsa-miR-664a-5p	-0.146532	0.00755285	0.00973834	2.18609	0.0304829	0.0439763	BRCA
IGF2BP3	hsa-miR-204-5p	-2.25921	5.75347e-36	8.87678e-35	2.18609	0.0304829	0.0439763	BRCA
IGF2BP3	hsa-let-7b-5p	-0.3675	2.69558e-08	5.70829e-08	2.18609	0.0304829	0.0439763	BRCA
KIAA1429	hsa-miR-378a-3p	-2.129	3.29674e-25	2.5432e-24	0.450604	6.00526e-05	0.000105092	BRCA
KIAA1429	hsa-miR-218-5p	-0.898302	5.69101e-23	3.61547e-22	0.450604	6.00526e-05	0.000105092	BRCA
RBM15	hsa-miR-22-3p	-0.611779	3.90877e-09	8.79474e-09	0.157882	0.0314116	0.0439763	BRCA
YTHDF1	hsa-miR-139-5p	-3.0699	3.13295e-43	3.38359e-41	0.587885	4.66088e-36	3.26262e-35	BRCA
YTHDF1	hsa-miR-218-5p	-0.898302	5.69101e-23	3.61547e-22	0.587885	4.66088e-36	3.26262e-35	BRCA
YTHDF1	hsa-miR-365a-3p	-1.52279	1.30267e-21	7.0344e-21	0.587885	4.66088e-36	3.26262e-35	BRCA
YTHDF1	hsa-miR-505-3p	-0.135643	2.51992e-07	4.9482e-07	0.587885	4.66088e-36	3.26262e-35	BRCA
YTHDF1	hsa-miR-186-5p	-0.253124	5.99889e-07	1.13954e-06	0.587885	4.66088e-36	3.26262e-35	BRCA
YTHDF2	hsa-miR-1-3p	-6.94169	3.48425e-22	2.09055e-21	0.134953	0.0018657	0.00301382	BRCA
YTHDF2	hsa-miR-145-5p	-2.48188	5.96215e-40	1.60978e-38	0.134953	0.0018657	0.00301382	BRCA
YTHDF2	hsa-miR-365a-3p	-1.52279	1.30267e-21	7.0344e-21	0.134953	0.0018657	0.00301382	BRCA
EIF3A	hsa-miR-362-5p	0.133429	0.0163348	0.0211095	-0.152598	0.0051851	0.00777765	HNSC
EIF3A	hsa-miR-130a-5p	1.45772	9.34961e-08	2.12261e-07	-0.152598	0.0051851	0.00777765	HNSC
EIF3A	hsa-miR-155-5p	0.67285	0.00243466	0.00371839	-0.152598	0.0051851	0.00777765	HNSC
EIF3A	hsa-miR-16-5p	0.594336	1.33615e-06	2.80591e-06	-0.152598	0.0051851	0.00777765	HNSC
EIF3A	hsa-miR-15a-5p	0.670296	3.7155e-09	9.17947e-09	-0.152598	0.0051851	0.00777765	HNSC
EIF3A	hsa-miR-15b-5p	0.987647	2.00534e-12	8.02136e-12	-0.152598	0.0051851	0.00777765	HNSC
EIF3A	hsa-miR-186-5p	0.415793	1.99511e-05	3.56573e-05	-0.152598	0.0051851	0.00777765	HNSC
EIF3A	hsa-miR-182-5p	1.3926	1.26721e-10	3.67055e-10	-0.152598	0.0051851	0.00777765	HNSC
EIF3A	hsa-miR-424-5p	1.71536	1.39584e-16	1.06591e-15	-0.152598	0.0051851	0.00777765	HNSC
RBM15B	hsa-miR-17-5p	1.39076	1.94942e-13	9.09731e-13	-0.29762	1.96006e-07	6.66559e-07	HNSC
RBM15B	hsa-miR-20a-5p	1.03034	2.34324e-09	6.151e-09	-0.29762	1.96006e-07	6.66559e-07	HNSC
YTHDC1	hsa-miR-424-5p	1.71536	1.39584e-16	1.06591e-15	-0.143358	0.000976932	0.00170963	HNSC
YTHDC2	hsa-miR-181b-5p	1.10008	1.27965e-16	1.06591e-15	-0.407123	3.68698e-07	9.67831e-07	HNSC
YTHDC2	hsa-miR-181d-5p	0.577525	0.00194373	0.00306182	-0.407123	3.68698e-07	9.67831e-07	HNSC
YTHDC2	hsa-miR-96-5p	1.66806	9.96758e-14	4.92516e-13	-0.407123	3.68698e-07	9.67831e-07	HNSC
YTHDF2	hsa-miR-301b-3p	1.93727	2.20756e-08	5.15098e-08	-0.105135	0.00489627	0.00777765	HNSC
YTHDF2	hsa-miR-130b-3p	1.64031	5.36453e-21	1.50207e-19	-0.105135	0.00489627	0.00777765	HNSC
ZC3H13	hsa-miR-130a-5p	1.45772	9.34961e-08	2.12261e-07	-0.143068	0.0102074	0.0142904	HNSC
HNRNPA2B1	hsa-miR-326	-0.113259	0.0362905	0.0435486	0.371462	8.54285e-09	3.588e-08	HNSC
HNRNPA2B1	hsa-let-7f-5p	-0.25474	0.000234188	0.000393435	0.371462	8.54285e-09	3.588e-08	HNSC
HNRNPA2B1	hsa-miR-340-5p	-0.424575	3.3216e-06	6.64319e-06	0.371462	8.54285e-09	3.588e-08	HNSC
HNRNPA2B1	hsa-miR-499a-5p	-2.61806	4.42618e-06	8.44998e-06	0.371462	8.54285e-09	3.588e-08	HNSC
HNRNPC	hsa-miR-495-3p	-1.54101	7.45037e-11	2.31789e-10	0.291917	7.9879e-07	1.86384e-06	HNSC
HNRNPC	hsa-miR-218-5p	-0.777894	1.06828e-10	3.20483e-10	0.291917	7.9879e-07	1.86384e-06	HNSC
HNRNPC	hsa-miR-136-3p	-1.97412	3.08502e-20	6.47854e-19	0.291917	7.9879e-07	1.86384e-06	HNSC
HNRNPC	hsa-miR-139-3p	-2.18503	5.04377e-22	2.11838e-20	0.291917	7.9879e-07	1.86384e-06	HNSC
HNRNPC	hsa-miR-30d-5p	-0.302154	2.51301e-05	4.39776e-05	0.291917	7.9879e-07	1.86384e-06	HNSC
HNRNPC	hsa-miR-30a-5p	-1.62146	1.83774e-19	2.57283e-18	0.291917	7.9879e-07	1.86384e-06	HNSC
HNRNPC	hsa-miR-499a-5p	-2.61806	4.42618e-06	8.44998e-06	0.291917	7.9879e-07	1.86384e-06	HNSC
HNRNPC	hsa-miR-299-5p	-2.5058	4.55147e-11	1.52929e-10	0.291917	7.9879e-07	1.86384e-06	HNSC
IGF2BP1	hsa-let-7b-5p	-0.182005	0.00580086	0.0081212	6.2522	1.93746e-19	4.06866e-18	HNSC
IGF2BP1	hsa-miR-29c-3p	-1.7354	4.28766e-19	5.14519e-18	6.2522	1.93746e-19	4.06866e-18	HNSC
IGF2BP2	hsa-let-7b-5p	-0.182005	0.00580086	0.0081212	2.42436	3.64633e-18	3.82865e-17	HNSC
IGF2BP3	hsa-miR-655-3p	-1.27697	3.47058e-06	6.77975e-06	2.29353	1.49395e-12	1.04577e-11	HNSC
KIAA1429	hsa-miR-218-5p	-0.777894	1.06828e-10	3.20483e-10	0.476417	4.04446e-11	2.12334e-10	HNSC
KIAA1429	hsa-miR-495-3p	-1.54101	7.45037e-11	2.31789e-10	0.476417	4.04446e-11	2.12334e-10	HNSC
KIAA1429	hsa-miR-133b	-2.59324	6.35932e-07	1.40574e-06	0.476417	4.04446e-11	2.12334e-10	HNSC
KIAA1429	hsa-miR-10b-5p	-0.662346	1.45962e-06	2.99045e-06	0.476417	4.04446e-11	2.12334e-10	HNSC
KIAA1429	hsa-miR-378c	-2.20057	9.36091e-14	4.91448e-13	0.476417	4.04446e-11	2.12334e-10	HNSC
KIAA1429	hsa-miR-338-3p	-0.908977	8.50481e-07	1.8318e-06	0.476417	4.04446e-11	2.12334e-10	HNSC
KIAA1429	hsa-miR-378a-3p	-1.72443	1.35506e-11	4.94893e-11	0.476417	4.04446e-11	2.12334e-10	HNSC
ALKBH5	hsa-miR-96-5p	2.96453	5.1662e-11	3.82969e-10	-0.240453	0.000271688	0.00043888	KICH
FTO	hsa-miR-30c-1-3p	0.592672	0.000551956	0.00100651	-0.701489	2.83345e-11	1.48756e-10	KICH
FTO	hsa-miR-30d-5p	0.988826	2.19593e-06	5.04251e-06	-0.701489	2.83345e-11	1.48756e-10	KICH
FTO	hsa-miR-30b-3p	2.18195	2.09231e-11	3.24308e-10	-0.701489	2.83345e-11	1.48756e-10	KICH
HNRNPC	hsa-miR-218-5p	2.52713	3.10731e-07	8.37624e-07	-0.785378	3.25698e-12	6.83965e-11	KICH
HNRNPC	hsa-miR-299-5p	0.473008	3.41862e-05	6.83725e-05	-0.785378	3.25698e-12	6.83965e-11	KICH
HNRNPC	hsa-miR-30d-5p	0.988826	2.19593e-06	5.04251e-06	-0.785378	3.25698e-12	6.83965e-11	KICH
IGF2BP1	hsa-miR-182-5p	3.17452	9.34681e-11	5.2682e-10	-2.96451	1.84858e-11	1.29401e-10	KICH
IGF2BP1	hsa-miR-9-5p	0.0464128	5.43944e-07	1.34898e-06	-2.96451	1.84858e-11	1.29401e-10	KICH
YTHDC1	hsa-miR-22-5p	0.402548	0.0231063	0.0341093	-0.391262	1.07843e-06	2.51633e-06	KICH
YTHDF2	hsa-miR-141-3p	2.13161	8.95016e-06	1.91348e-05	-0.248004	0.000191624	0.000335342	KICH
CBLL1	hsa-miR-212-3p	-1.37127	9.61445e-09	2.98048e-08	0.818223	7.70631e-09	2.69721e-08	KICH
CBLL1	hsa-miR-501-3p	-0.204337	0.000172318	0.000333866	0.818223	7.70631e-09	2.69721e-08	KICH
CBLL1	hsa-miR-26b-5p	-1.38635	9.06624e-13	5.62107e-11	0.818223	7.70631e-09	2.69721e-08	KICH
IGF2BP2	hsa-miR-181c-5p	-1.40843	2.51587e-10	1.19988e-09	1.08384	1.23408e-06	2.59156e-06	KICH
IGF2BP2	hsa-miR-98-5p	-0.889963	9.02593e-09	2.9453e-08	1.08384	1.23408e-06	2.59156e-06	KICH
IGF2BP2	hsa-miR-335-5p	-2.2085	3.65833e-11	3.78027e-10	1.08384	1.23408e-06	2.59156e-06	KICH
IGF2BP2	hsa-miR-181d-5p	-1.61498	6.17692e-11	3.82969e-10	1.08384	1.23408e-06	2.59156e-06	KICH
KIAA1429	hsa-miR-107	-0.203299	0.00608993	0.0099362	0.289236	0.0317776	0.0370739	KICH
KIAA1429	hsa-miR-10b-5p	-0.343836	0.00696644	0.010798	0.289236	0.0317776	0.0370739	KICH
RBM15B	hsa-miR-423-3p	-0.473462	2.73142e-06	6.04815e-06	0.557172	1.92468e-06	3.6744e-06	KICH
YTHDF1	hsa-miR-139-5p	-0.180367	1.68578e-06	4.01995e-06	0.409013	5.42161e-08	1.62648e-07	KICH
EIF3A	hsa-miR-340-5p	1.21641	1.42501e-13	4.44268e-13	-0.354311	1.23795e-13	6.49923e-13	KIRC
EIF3A	hsa-miR-195-5p	0.393359	0.0178884	0.0237021	-0.354311	1.23795e-13	6.49923e-13	KIRC
HNRNPA2B1	hsa-miR-33b-5p	0.715523	0.000527391	0.000887357	-0.108762	0.000783561	0.00126575	KIRC
HNRNPA2B1	hsa-miR-195-5p	0.393359	0.0178884	0.0237021	-0.108762	0.000783561	0.00126575	KIRC
HNRNPA2B1	hsa-miR-23a-3p	0.792864	3.40285e-24	2.25439e-23	-0.108762	0.000783561	0.00126575	KIRC
HNRNPA2B1	hsa-miR-338-3p	0.780889	2.87497e-13	8.46519e-13	-0.108762	0.000783561	0.00126575	KIRC
HNRNPA2B1	hsa-miR-374a-3p	1.14302	1.60661e-30	3.83263e-29	-0.108762	0.000783561	0.00126575	KIRC
HNRNPA2B1	hsa-miR-708-3p	1.16134	5.62482e-08	1.12496e-07	-0.108762	0.000783561	0.00126575	KIRC
HNRNPA2B1	hsa-miR-211-5p	0.80846	0.0163967	0.0222827	-0.108762	0.000783561	0.00126575	KIRC
HNRNPA2B1	hsa-miR-330-5p	1.4594	2.97649e-30	4.50726e-29	-0.108762	0.000783561	0.00126575	KIRC
IGF2BP2	hsa-miR-181d-5p	1.14947	9.94547e-14	3.19461e-13	-1.04798	6.91068e-23	1.45124e-21	KIRC
IGF2BP2	hsa-let-7b-5p	0.830192	3.89549e-22	1.96629e-21	-1.04798	6.91068e-23	1.45124e-21	KIRC
IGF2BP2	hsa-miR-181a-5p	1.25023	1.39074e-25	1.13399e-24	-1.04798	6.91068e-23	1.45124e-21	KIRC
IGF2BP2	hsa-miR-181b-5p	1.6447	1.99591e-30	3.83263e-29	-1.04798	6.91068e-23	1.45124e-21	KIRC
IGF2BP2	hsa-miR-181c-5p	0.973551	1.71708e-10	3.87256e-10	-1.04798	6.91068e-23	1.45124e-21	KIRC
IGF2BP2	hsa-miR-9-5p	0.0348988	1.68491e-14	5.76129e-14	-1.04798	6.91068e-23	1.45124e-21	KIRC
METTL14	hsa-miR-1307-3p	0.331708	0.0139931	0.0195167	-0.284681	2.5112e-09	6.5919e-09	KIRC
RBM15B	hsa-miR-34a-5p	1.12108	3.87958e-19	1.78798e-18	-0.117276	7.80514e-05	0.00013659	KIRC
YTHDF3	hsa-miR-17-5p	0.578906	3.16158e-11	7.79367e-11	-0.152613	2.29182e-06	4.81282e-06	KIRC
YTHDF3	hsa-miR-181d-5p	1.14947	9.94547e-14	3.19461e-13	-0.152613	2.29182e-06	4.81282e-06	KIRC
YTHDF3	hsa-miR-106b-5p	1.10526	1.86059e-27	2.19136e-26	-0.152613	2.29182e-06	4.81282e-06	KIRC
YTHDF3	hsa-miR-20a-5p	0.769154	1.57561e-12	4.51391e-12	-0.152613	2.29182e-06	4.81282e-06	KIRC
YTHDF3	hsa-miR-181c-5p	0.973551	1.71708e-10	3.87256e-10	-0.152613	2.29182e-06	4.81282e-06	KIRC
ALKBH5	hsa-miR-96-5p	-0.329857	1.66167e-06	3.20249e-06	0.267647	3.4405e-13	1.44501e-12	KIRC
FTO	hsa-miR-30d-5p	-0.144499	0.00730346	0.0107523	0.606508	5.0958e-19	5.35059e-18	KIRC
FTO	hsa-miR-33a-5p	-1.6282	6.26296e-16	2.28922e-15	0.606508	5.0958e-19	5.35059e-18	KIRC
FTO	hsa-miR-30b-5p	-1.30428	6.29664e-18	2.56709e-17	0.606508	5.0958e-19	5.35059e-18	KIRC
IGF2BP3	hsa-miR-204-5p	-1.2333	2.26346e-11	5.85186e-11	2.64365	4.25314e-08	9.924e-08	KIRC
IGF2BP3	hsa-let-7c-5p	-0.109101	0.0170677	0.0229009	2.64365	4.25314e-08	9.924e-08	KIRC
IGF2BP3	hsa-let-7g-5p	-0.596947	2.52634e-15	8.92642e-15	2.64365	4.25314e-08	9.924e-08	KIRC
WTAP	hsa-miR-23b-3p	-0.423774	5.69075e-12	1.50805e-11	0.343501	6.51489e-12	1.95447e-11	KIRC
YTHDC2	hsa-miR-96-5p	-0.329857	1.66167e-06	3.20249e-06	0.415651	1.5122e-12	5.29271e-12	KIRC
ALKBH5	hsa-miR-92a-3p	0.25426	0.0132863	0.018889	-0.197658	0.000238235	0.000416911	KIRP
ALKBH5	hsa-miR-96-5p	1.60569	1.79933e-08	6.06631e-08	-0.197658	0.000238235	0.000416911	KIRP
EIF3A	hsa-miR-15a-5p	0.539127	0.00223907	0.00347646	-0.313344	5.77377e-05	0.000121249	KIRP
EIF3A	hsa-miR-340-5p	1.08707	2.09584e-09	8.52789e-09	-0.313344	5.77377e-05	0.000121249	KIRP
EIF3A	hsa-miR-155-5p	0.650443	1.09044e-07	3.06813e-07	-0.313344	5.77377e-05	0.000121249	KIRP
KIAA1429	hsa-miR-103a-3p	0.626657	3.86874e-08	1.23381e-07	-0.289053	3.58404e-07	1.88162e-06	KIRP
YTHDF2	hsa-miR-181d-5p	1.01995	2.04873e-07	5.56596e-07	-0.236382	1.25392e-06	3.99684e-06	KIRP
YTHDF2	hsa-miR-19a-3p	0.374169	0.0121774	0.0175235	-0.236382	1.25392e-06	3.99684e-06	KIRP
YTHDF2	hsa-miR-454-3p	0.467562	0.00287243	0.00434547	-0.236382	1.25392e-06	3.99684e-06	KIRP
YTHDF3	hsa-miR-106b-5p	0.891365	4.87811e-11	2.74103e-10	-0.427385	4.49987e-09	4.72486e-08	KIRP
YTHDF3	hsa-miR-20a-5p	0.639254	9.45496e-07	2.10507e-06	-0.427385	4.49987e-09	4.72486e-08	KIRP
YTHDF3	hsa-miR-17-5p	0.622755	5.98589e-07	1.47153e-06	-0.427385	4.49987e-09	4.72486e-08	KIRP
YTHDF3	hsa-miR-93-5p	1.32802	7.24121e-15	8.54463e-14	-0.427385	4.49987e-09	4.72486e-08	KIRP
YTHDF3	hsa-miR-181d-5p	1.01995	2.04873e-07	5.56596e-07	-0.427385	4.49987e-09	4.72486e-08	KIRP
YTHDF3	hsa-miR-135b-5p	1.12366	8.88638e-07	2.01652e-06	-0.427385	4.49987e-09	4.72486e-08	KIRP
HNRNPA2B1	hsa-miR-539-5p	-1.83016	6.08803e-11	3.2654e-10	0.221854	0.000184883	0.000352958	KIRP
HNRNPA2B1	hsa-miR-188-5p	-1.18982	1.01127e-11	6.6294e-11	0.221854	0.000184883	0.000352958	KIRP
HNRNPA2B1	hsa-miR-326	-0.219239	0.000931301	0.0015263	0.221854	0.000184883	0.000352958	KIRP
HNRNPA2B1	hsa-miR-615-3p	-0.666933	0.000332204	0.000585076	0.221854	0.000184883	0.000352958	KIRP
HNRNPA2B1	hsa-miR-33b-5p	-0.371936	0.000980163	0.00158437	0.221854	0.000184883	0.000352958	KIRP
HNRNPA2B1	hsa-miR-190a-5p	-0.911195	5.01786e-10	2.27734e-09	0.221854	0.000184883	0.000352958	KIRP
HNRNPA2B1	hsa-miR-424-5p	-1.70364	1.54873e-14	1.66136e-13	0.221854	0.000184883	0.000352958	KIRP
HNRNPA2B1	hsa-miR-33a-5p	-2.63462	3.32059e-17	5.59757e-16	0.221854	0.000184883	0.000352958	KIRP
HNRNPA2B1	hsa-miR-204-5p	-0.85486	1.22012e-06	2.61771e-06	0.221854	0.000184883	0.000352958	KIRP
HNRNPA2B1	hsa-miR-708-3p	-0.16113	0.0159435	0.0223968	0.221854	0.000184883	0.000352958	KIRP
HNRNPA2B1	hsa-miR-16-5p	-0.117677	0.00101325	0.00161573	0.221854	0.000184883	0.000352958	KIRP
HNRNPA2B1	hsa-miR-338-3p	-1.48346	1.23721e-09	5.40707e-09	0.221854	0.000184883	0.000352958	KIRP
HNRNPA2B1	hsa-miR-1296-5p	-1.00509	1.70341e-11	1.00501e-10	0.221854	0.000184883	0.000352958	KIRP
HNRNPC	hsa-miR-505-5p	-0.272868	0.00329808	0.00486466	0.209837	0.00038212	0.000617271	KIRP
HNRNPC	hsa-miR-218-5p	-0.418585	0.0024188	0.00370673	0.209837	0.00038212	0.000617271	KIRP
HNRNPC	hsa-miR-485-3p	-1.75694	2.79698e-08	9.16789e-08	0.209837	0.00038212	0.000617271	KIRP
HNRNPC	hsa-miR-30b-5p	-1.38525	6.65476e-12	4.61919e-11	0.209837	0.00038212	0.000617271	KIRP
HNRNPC	hsa-miR-615-3p	-0.666933	0.000332204	0.000585076	0.209837	0.00038212	0.000617271	KIRP
HNRNPC	hsa-miR-30a-5p	-0.219653	0.000789398	0.00131196	0.209837	0.00038212	0.000617271	KIRP
HNRNPC	hsa-miR-139-3p	-2.6212	1.28325e-19	7.57119e-18	0.209837	0.00038212	0.000617271	KIRP
IGF2BP2	hsa-miR-141-3p	-0.739189	1.30307e-17	3.07524e-16	1.15599	1.33228e-06	3.99684e-06	KIRP
IGF2BP2	hsa-miR-188-5p	-1.18982	1.01127e-11	6.6294e-11	1.15599	1.33228e-06	3.99684e-06	KIRP
IGF2BP3	hsa-miR-204-5p	-0.85486	1.22012e-06	2.61771e-06	3.13565	2.58404e-06	6.02943e-06	KIRP
RBM15B	hsa-miR-542-3p	-0.600311	5.35995e-07	1.37494e-06	0.374656	4.22291e-08	2.95603e-07	KIRP
RBM15B	hsa-miR-16-5p	-0.117677	0.00101325	0.00161573	0.374656	4.22291e-08	2.95603e-07	KIRP
RBM15B	hsa-miR-106a-5p	-0.704597	1.2685e-08	4.67761e-08	0.374656	4.22291e-08	2.95603e-07	KIRP
RBM15B	hsa-miR-20b-5p	-0.466072	6.23052e-07	1.50041e-06	0.374656	4.22291e-08	2.95603e-07	KIRP
YTHDF1	hsa-miR-139-5p	-2.08569	9.85186e-19	3.28047e-17	0.318397	5.62985e-07	2.36454e-06	KIRP
YTHDF1	hsa-miR-660-5p	-1.07711	3.48417e-09	1.37044e-08	0.318397	5.62985e-07	2.36454e-06	KIRP
YTHDF1	hsa-miR-374b-5p	-0.172775	0.00943219	0.0137407	0.318397	5.62985e-07	2.36454e-06	KIRP
FTO	hsa-miR-151a-3p	0.541439	0.0024512	0.00373808	-0.109088	0.0203961	0.0267698	LIHC
FTO	hsa-miR-204-5p	0.765383	1.33154e-05	2.53826e-05	-0.109088	0.0203961	0.0267698	LIHC
FTO	hsa-miR-135b-5p	1.9715	0.037652	0.0478495	-0.109088	0.0203961	0.0267698	LIHC
FTO	hsa-miR-30d-5p	0.992196	5.49119e-11	1.76296e-10	-0.109088	0.0203961	0.0267698	LIHC
FTO	hsa-miR-495-3p	0.569817	1.21598e-05	2.40498e-05	-0.109088	0.0203961	0.0267698	LIHC
FTO	hsa-miR-3913-5p	0.325704	0.0143985	0.0199616	-0.109088	0.0203961	0.0267698	LIHC
FTO	hsa-miR-21-5p	1.55999	4.33401e-23	6.60937e-22	-0.109088	0.0203961	0.0267698	LIHC
FTO	hsa-miR-485-3p	1.73123	0.00239663	0.00373808	-0.109088	0.0203961	0.0267698	LIHC
FTO	hsa-miR-181b-5p	0.810589	2.5707e-05	4.7519e-05	-0.109088	0.0203961	0.0267698	LIHC
FTO	hsa-miR-181a-5p	0.454251	0.00779908	0.0113109	-0.109088	0.0203961	0.0267698	LIHC
METTL14	hsa-miR-1307-3p	1.02004	3.00468e-11	1.01825e-10	-0.449238	1.95832e-09	6.85412e-09	LIHC
METTL14	hsa-miR-3913-5p	0.325704	0.0143985	0.0199616	-0.449238	1.95832e-09	6.85412e-09	LIHC
METTL14	hsa-miR-34c-3p	1.96033	0.00523411	0.00778734	-0.449238	1.95832e-09	6.85412e-09	LIHC
YTHDC1	hsa-miR-34a-5p	1.11644	6.36171e-13	2.58709e-12	-0.221484	1.49758e-06	2.85901e-06	LIHC
YTHDC1	hsa-miR-107	0.363299	0.00797328	0.0113109	-0.221484	1.49758e-06	2.85901e-06	LIHC
YTHDC2	hsa-miR-181a-5p	0.454251	0.00779908	0.0113109	-0.146782	0.0168524	0.0235933	LIHC
YTHDC2	hsa-miR-148b-3p	0.345541	0.0003271	0.000539273	-0.146782	0.0168524	0.0235933	LIHC
YTHDC2	hsa-miR-495-3p	0.569817	1.21598e-05	2.40498e-05	-0.146782	0.0168524	0.0235933	LIHC
CBLL1	hsa-miR-144-3p	-1.96405	1.19257e-22	1.45494e-21	0.399955	2.99826e-06	4.84334e-06	LIHC
HNRNPA2B1	hsa-miR-497-5p	-1.08143	4.64882e-19	2.83578e-18	0.266022	8.0764e-07	1.69604e-06	LIHC
HNRNPA2B1	hsa-miR-195-5p	-1.46774	5.74147e-22	5.83717e-21	0.266022	8.0764e-07	1.69604e-06	LIHC
HNRNPC	hsa-miR-30e-5p	-0.516144	7.01467e-12	2.67434e-11	0.289821	3.28653e-09	9.85959e-09	LIHC
HNRNPC	hsa-miR-505-5p	-0.278364	4.44717e-08	1.23308e-07	0.289821	3.28653e-09	9.85959e-09	LIHC
HNRNPC	hsa-miR-30a-5p	-0.242119	7.40928e-06	1.61416e-05	0.289821	3.28653e-09	9.85959e-09	LIHC
HNRNPC	hsa-miR-139-3p	-2.13094	6.16621e-29	3.76139e-27	0.289821	3.28653e-09	9.85959e-09	LIHC
IGF2BP1	hsa-miR-378a-3p	-0.741129	1.38664e-11	4.97558e-11	7.58119	2.73693e-14	2.87377e-13	LIHC
IGF2BP1	hsa-miR-22-3p	-0.506317	5.82029e-11	1.77519e-10	7.58119	2.73693e-14	2.87377e-13	LIHC
IGF2BP1	hsa-let-7c-5p	-1.31251	3.92432e-23	6.60937e-22	7.58119	2.73693e-14	2.87377e-13	LIHC
IGF2BP1	hsa-let-7a-5p	-0.273756	0.000380699	0.000611122	7.58119	2.73693e-14	2.87377e-13	LIHC
IGF2BP1	hsa-let-7b-5p	-0.68902	3.95645e-13	1.85649e-12	7.58119	2.73693e-14	2.87377e-13	LIHC
IGF2BP1	hsa-let-7g-5p	-0.362597	1.2222e-05	2.40498e-05	7.58119	2.73693e-14	2.87377e-13	LIHC
IGF2BP1	hsa-miR-29b-3p	-0.122213	0.0218346	0.0289546	7.58119	2.73693e-14	2.87377e-13	LIHC
IGF2BP1	hsa-miR-29c-3p	-1.17603	2.09882e-21	1.82897e-20	7.58119	2.73693e-14	2.87377e-13	LIHC
IGF2BP1	hsa-miR-29a-3p	-0.707517	5.86139e-13	2.55389e-12	7.58119	2.73693e-14	2.87377e-13	LIHC
IGF2BP3	hsa-let-7g-5p	-0.362597	1.2222e-05	2.40498e-05	4.12764	2.59127e-13	1.81389e-12	LIHC
IGF2BP3	hsa-let-7c-5p	-1.31251	3.92432e-23	6.60937e-22	4.12764	2.59127e-13	1.81389e-12	LIHC
IGF2BP3	hsa-let-7a-5p	-0.273756	0.000380699	0.000611122	4.12764	2.59127e-13	1.81389e-12	LIHC
IGF2BP3	hsa-let-7b-5p	-0.68902	3.95645e-13	1.85649e-12	4.12764	2.59127e-13	1.81389e-12	LIHC
KIAA1429	hsa-miR-10a-5p	-1.06026	3.7218e-17	1.89192e-16	0.650428	9.17407e-13	3.85311e-12	LIHC
KIAA1429	hsa-miR-378c	-1.0099	1.08931e-17	6.0407e-17	0.650428	9.17407e-13	3.85311e-12	LIHC
YTHDF1	hsa-miR-139-5p	-1.67414	2.14996e-25	6.55739e-24	0.16039	0.00135643	0.00203465	LIHC
FTO	hsa-miR-23c	0.987109	0.00113589	0.00165372	-0.582796	2.86111e-14	1.50208e-13	LUAD
FTO	hsa-miR-33a-5p	3.02309	7.92308e-20	7.13078e-19	-0.582796	2.86111e-14	1.50208e-13	LUAD
FTO	hsa-miR-21-5p	2.22483	5.61689e-26	2.78036e-24	-0.582796	2.86111e-14	1.50208e-13	LUAD
FTO	hsa-miR-181b-5p	0.804981	9.15309e-11	2.32348e-10	-0.582796	2.86111e-14	1.50208e-13	LUAD
FTO	hsa-miR-33b-5p	3.24925	1.15605e-15	4.76872e-15	-0.582796	2.86111e-14	1.50208e-13	LUAD
FTO	hsa-miR-590-5p	1.81578	1.1411e-18	8.68993e-18	-0.582796	2.86111e-14	1.50208e-13	LUAD
FTO	hsa-miR-181c-5p	0.566615	0.00299843	0.00418091	-0.582796	2.86111e-14	1.50208e-13	LUAD
FTO	hsa-miR-192-5p	3.69631	5.51894e-11	1.47669e-10	-0.582796	2.86111e-14	1.50208e-13	LUAD
FTO	hsa-miR-155-5p	0.769546	6.71746e-06	1.10838e-05	-0.582796	2.86111e-14	1.50208e-13	LUAD
FTO	hsa-miR-30e-5p	0.697837	3.34812e-08	6.49929e-08	-0.582796	2.86111e-14	1.50208e-13	LUAD
FTO	hsa-miR-31-5p	4.36171	1.07209e-07	2.00258e-07	-0.582796	2.86111e-14	1.50208e-13	LUAD
FTO	hsa-miR-186-5p	0.864023	3.60118e-16	1.62053e-15	-0.582796	2.86111e-14	1.50208e-13	LUAD
METTL14	hsa-miR-1307-3p	0.174631	1.07583e-14	3.67265e-14	-0.245949	3.65168e-09	9.58565e-09	LUAD
WTAP	hsa-miR-365a-3p	0.41393	0.00460133	0.00615584	-0.260056	4.85593e-07	9.27041e-07	LUAD
WTAP	hsa-miR-141-3p	2.07818	4.38861e-22	6.20675e-21	-0.260056	4.85593e-07	9.27041e-07	LUAD
WTAP	hsa-miR-34a-5p	1.32265	1.22747e-15	4.86076e-15	-0.260056	4.85593e-07	9.27041e-07	LUAD
WTAP	hsa-miR-200a-3p	2.48851	6.57338e-21	8.13455e-20	-0.260056	4.85593e-07	9.27041e-07	LUAD
EIF3A	hsa-miR-195-5p	-1.72657	1.34017e-16	6.63385e-16	0.177513	0.0232012	0.0324817	LUAD
EIF3A	hsa-miR-374b-5p	-0.581476	2.3535e-07	4.31476e-07	0.177513	0.0232012	0.0324817	LUAD
EIF3A	hsa-miR-374a-5p	-1.12212	5.75823e-17	3.56291e-16	0.177513	0.0232012	0.0324817	LUAD
HNRNPA2B1	hsa-miR-30a-5p	-1.33642	4.83386e-15	1.70912e-14	0.454824	4.0619e-18	2.84333e-17	LUAD
HNRNPA2B1	hsa-let-7f-5p	-1.42178	2.19835e-13	6.80115e-13	0.454824	4.0619e-18	2.84333e-17	LUAD
HNRNPA2B1	hsa-miR-140-3p	-0.899625	1.7429e-18	1.15031e-17	0.454824	4.0619e-18	2.84333e-17	LUAD
HNRNPA2B1	hsa-miR-195-5p	-1.72657	1.34017e-16	6.63385e-16	0.454824	4.0619e-18	2.84333e-17	LUAD
HNRNPA2B1	hsa-miR-30d-5p	-0.630241	7.15299e-09	1.50669e-08	0.454824	4.0619e-18	2.84333e-17	LUAD
HNRNPC	hsa-miR-30d-5p	-0.630241	7.15299e-09	1.50669e-08	0.609192	1.60793e-22	1.68833e-21	LUAD
HNRNPC	hsa-miR-139-3p	-3.55515	2.30792e-24	6.2592e-23	0.609192	1.60793e-22	1.68833e-21	LUAD
HNRNPC	hsa-miR-218-5p	-1.21955	2.45503e-13	7.36509e-13	0.609192	1.60793e-22	1.68833e-21	LUAD
HNRNPC	hsa-miR-30a-5p	-1.33642	4.83386e-15	1.70912e-14	0.609192	1.60793e-22	1.68833e-21	LUAD
IGF2BP1	hsa-let-7c-5p	-1.65662	2.27428e-22	3.75256e-21	6.78431	4.00798e-11	1.40279e-10	LUAD
IGF2BP1	hsa-let-7a-5p	-1.2777	5.89589e-23	1.16739e-21	6.78431	4.00798e-11	1.40279e-10	LUAD
IGF2BP1	hsa-let-7b-5p	-1.37407	2.2645e-09	4.98191e-09	6.78431	4.00798e-11	1.40279e-10	LUAD
IGF2BP1	hsa-let-7g-5p	-0.666822	1.38617e-08	2.80062e-08	6.78431	4.00798e-11	1.40279e-10	LUAD
IGF2BP1	hsa-let-7f-5p	-1.42178	2.19835e-13	6.80115e-13	6.78431	4.00798e-11	1.40279e-10	LUAD
IGF2BP3	hsa-let-7c-5p	-1.65662	2.27428e-22	3.75256e-21	3.76555	5.81031e-13	2.44033e-12	LUAD
IGF2BP3	hsa-let-7a-5p	-1.2777	5.89589e-23	1.16739e-21	3.76555	5.81031e-13	2.44033e-12	LUAD
IGF2BP3	hsa-miR-181a-5p	-0.485695	0.021006	0.025674	3.76555	5.81031e-13	2.44033e-12	LUAD
IGF2BP3	hsa-let-7b-5p	-1.37407	2.2645e-09	4.98191e-09	3.76555	5.81031e-13	2.44033e-12	LUAD
IGF2BP3	hsa-let-7g-5p	-0.666822	1.38617e-08	2.80062e-08	3.76555	5.81031e-13	2.44033e-12	LUAD
KIAA1429	hsa-miR-218-5p	-1.21955	2.45503e-13	7.36509e-13	0.375415	2.68135e-08	6.25648e-08	LUAD
YTHDF1	hsa-miR-139-5p	-2.07389	6.73013e-10	1.51428e-09	0.608531	2.32082e-23	4.87373e-22	LUAD
YTHDF1	hsa-miR-218-5p	-1.21955	2.45503e-13	7.36509e-13	0.608531	2.32082e-23	4.87373e-22	LUAD
FTO	hsa-miR-219a-5p	1.67067	3.11701e-12	1.00437e-11	-0.586358	1.47038e-18	6.1756e-18	LUSC
FTO	hsa-miR-192-5p	1.18191	2.39253e-07	5.33717e-07	-0.586358	1.47038e-18	6.1756e-18	LUSC
FTO	hsa-miR-485-3p	2.05386	1.65534e-07	3.84039e-07	-0.586358	1.47038e-18	6.1756e-18	LUSC
FTO	hsa-miR-590-5p	1.44075	6.85479e-19	3.61435e-18	-0.586358	1.47038e-18	6.1756e-18	LUSC
YTHDC2	hsa-miR-152-3p	0.672821	1.06216e-05	1.81192e-05	-0.144474	0.00181343	0.00292939	LUSC
EIF3A	hsa-miR-374b-5p	-0.468531	3.3743e-07	7.24849e-07	0.212483	0.00323704	0.00485556	LUSC
EIF3A	hsa-miR-374a-5p	-0.320411	9.74289e-06	1.71239e-05	0.212483	0.00323704	0.00485556	LUSC
EIF3A	hsa-miR-15a-5p	-0.169513	0.00158903	0.0022479	0.212483	0.00323704	0.00485556	LUSC
HNRNPA2B1	hsa-miR-23b-3p	-0.210335	0.000117078	0.000178699	0.628167	1.56034e-22	1.09224e-21	LUSC
HNRNPA2B1	hsa-miR-195-5p	-1.48697	2.08102e-24	4.02331e-23	0.628167	1.56034e-22	1.09224e-21	LUSC
HNRNPA2B1	hsa-miR-497-5p	-1.25028	3.54046e-22	2.83226e-21	0.628167	1.56034e-22	1.09224e-21	LUSC
HNRNPA2B1	hsa-miR-326	-1.93705	2.33794e-20	1.50668e-19	0.628167	1.56034e-22	1.09224e-21	LUSC
HNRNPC	hsa-miR-144-3p	-2.68855	3.49088e-20	2.02471e-19	0.684526	4.39519e-24	4.61495e-23	LUSC
HNRNPC	hsa-miR-30a-5p	-2.74074	5.45097e-25	3.16157e-23	0.684526	4.39519e-24	4.61495e-23	LUSC
HNRNPC	hsa-miR-139-3p	-2.24528	6.64085e-24	7.70339e-23	0.684526	4.39519e-24	4.61495e-23	LUSC
HNRNPC	hsa-miR-30d-5p	-2.0151	5.41986e-24	7.70339e-23	0.684526	4.39519e-24	4.61495e-23	LUSC
IGF2BP1	hsa-let-7b-5p	-0.668578	1.82142e-14	6.21426e-14	7.3783	1.13324e-20	5.9495e-20	LUSC
IGF2BP1	hsa-miR-22-3p	-0.415097	5.54893e-12	1.60919e-11	7.3783	1.13324e-20	5.9495e-20	LUSC
IGF2BP1	hsa-miR-140-5p	-0.530529	5.16972e-12	1.57813e-11	7.3783	1.13324e-20	5.9495e-20	LUSC
IGF2BP1	hsa-miR-150-5p	-0.404511	6.87424e-06	1.28615e-05	7.3783	1.13324e-20	5.9495e-20	LUSC
IGF2BP1	hsa-miR-29c-3p	-1.10501	1.52717e-17	5.90508e-17	7.3783	1.13324e-20	5.9495e-20	LUSC
IGF2BP1	hsa-miR-29a-3p	-0.861243	8.39463e-18	3.47777e-17	7.3783	1.13324e-20	5.9495e-20	LUSC
IGF2BP2	hsa-let-7b-5p	-0.668578	1.82142e-14	6.21426e-14	2.66581	1.69801e-17	5.94305e-17	LUSC
IGF2BP2	hsa-miR-181b-5p	-0.418266	7.4841e-09	1.8873e-08	2.66581	1.69801e-17	5.94305e-17	LUSC
IGF2BP2	hsa-miR-181a-5p	-1.2211	3.90656e-22	2.83226e-21	2.66581	1.69801e-17	5.94305e-17	LUSC
IGF2BP3	hsa-let-7a-5p	-0.68476	6.59521e-15	2.39076e-14	4.96139	1.13623e-25	2.38608e-24	LUSC
IGF2BP3	hsa-let-7b-5p	-0.668578	1.82142e-14	6.21426e-14	4.96139	1.13623e-25	2.38608e-24	LUSC
IGF2BP3	hsa-miR-181b-5p	-0.418266	7.4841e-09	1.8873e-08	4.96139	1.13623e-25	2.38608e-24	LUSC
IGF2BP3	hsa-miR-181a-5p	-1.2211	3.90656e-22	2.83226e-21	4.96139	1.13623e-25	2.38608e-24	LUSC
ALKBH5	hsa-miR-92a-3p	1.54805	5.48124e-27	2.40721e-25	-0.141546	0.000575559	0.0010988	PRAD
ALKBH5	hsa-miR-96-5p	2.34573	2.88011e-25	5.1362e-24	-0.141546	0.000575559	0.0010988	PRAD
CBLL1	hsa-miR-501-3p	1.46205	3.03211e-22	3.60485e-21	-0.0970522	0.0110798	0.0166197	PRAD
FTO	hsa-miR-151a-3p	0.186036	0.0101373	0.0147394	-0.500054	4.9357e-15	2.59125e-14	PRAD
FTO	hsa-miR-21-5p	1.052	6.20418e-20	5.10652e-19	-0.500054	4.9357e-15	2.59125e-14	PRAD
FTO	hsa-miR-135a-5p	0.219517	1.58654e-06	3.53667e-06	-0.500054	4.9357e-15	2.59125e-14	PRAD
FTO	hsa-miR-186-5p	0.553882	1.48268e-11	4.95773e-11	-0.500054	4.9357e-15	2.59125e-14	PRAD
FTO	hsa-miR-30a-5p	0.576428	2.64859e-06	5.66798e-06	-0.500054	4.9357e-15	2.59125e-14	PRAD
FTO	hsa-miR-30d-5p	0.892144	9.31992e-18	6.2327e-17	-0.500054	4.9357e-15	2.59125e-14	PRAD
FTO	hsa-miR-30c-5p	0.817609	1.11662e-12	4.11994e-12	-0.500054	4.9357e-15	2.59125e-14	PRAD
FTO	hsa-miR-30b-3p	1.28	2.99999e-14	1.28399e-13	-0.500054	4.9357e-15	2.59125e-14	PRAD
FTO	hsa-miR-3913-5p	0.353899	0.00481222	0.00746242	-0.500054	4.9357e-15	2.59125e-14	PRAD
FTO	hsa-miR-495-3p	0.583046	6.70613e-07	1.59457e-06	-0.500054	4.9357e-15	2.59125e-14	PRAD
FTO	hsa-miR-485-3p	0.199526	0.0145233	0.0201817	-0.500054	4.9357e-15	2.59125e-14	PRAD
FTO	hsa-miR-30b-5p	1.223	1.10368e-15	5.62352e-15	-0.500054	4.9357e-15	2.59125e-14	PRAD
FTO	hsa-miR-590-5p	0.765268	9.26831e-09	2.68029e-08	-0.500054	4.9357e-15	2.59125e-14	PRAD
IGF2BP2	hsa-miR-141-3p	1.71887	3.5339e-19	2.52085e-18	-1.16155	1.13514e-10	3.97297e-10	PRAD
IGF2BP2	hsa-miR-200a-3p	0.423384	0.00110534	0.00181956	-1.16155	1.13514e-10	3.97297e-10	PRAD
KIAA1429	hsa-miR-103a-3p	1.23036	5.4645e-26	1.46176e-24	-0.039295	0.0317152	0.0416262	PRAD
KIAA1429	hsa-miR-10b-5p	0.682555	4.03409e-09	1.19902e-08	-0.039295	0.0317152	0.0416262	PRAD
KIAA1429	hsa-miR-495-3p	0.583046	6.70613e-07	1.59457e-06	-0.039295	0.0317152	0.0416262	PRAD
KIAA1429	hsa-miR-153-3p	2.3174	9.19375e-21	8.94301e-20	-0.039295	0.0317152	0.0416262	PRAD
METTL14	hsa-miR-3913-5p	0.353899	0.00481222	0.00746242	-0.259648	4.15995e-06	8.73589e-06	PRAD
METTL14	hsa-miR-30b-3p	1.28	2.99999e-14	1.28399e-13	-0.259648	4.15995e-06	8.73589e-06	PRAD
METTL14	hsa-miR-1307-3p	1.28663	3.41586e-20	3.0458e-19	-0.259648	4.15995e-06	8.73589e-06	PRAD
HNRNPA2B1	hsa-miR-326	-0.704324	4.6876e-08	1.28608e-07	0.362451	4.49759e-16	3.14831e-15	PRAD
HNRNPA2B1	hsa-miR-27b-3p	-0.629853	1.75297e-17	1.09509e-16	0.362451	4.49759e-16	3.14831e-15	PRAD
HNRNPA2B1	hsa-miR-23c	-2.55494	6.17092e-22	6.60289e-21	0.362451	4.49759e-16	3.14831e-15	PRAD
HNRNPA2B1	hsa-miR-944	-0.494976	0.00174351	0.00278442	0.362451	4.49759e-16	3.14831e-15	PRAD
HNRNPA2B1	hsa-miR-23b-3p	-0.592132	4.65726e-12	1.66109e-11	0.362451	4.49759e-16	3.14831e-15	PRAD
HNRNPA2B1	hsa-miR-330-5p	-0.481975	0.000265148	0.000489153	0.362451	4.49759e-16	3.14831e-15	PRAD
HNRNPA2B1	hsa-miR-204-5p	-1.81278	1.45519e-06	3.3849e-06	0.362451	4.49759e-16	3.14831e-15	PRAD
HNRNPA2B1	hsa-miR-23a-3p	-0.397387	2.1168e-07	5.3928e-07	0.362451	4.49759e-16	3.14831e-15	PRAD
HNRNPC	hsa-miR-136-3p	-1.17673	3.54569e-11	1.11585e-10	0.176955	1.08183e-06	2.52427e-06	PRAD
HNRNPC	hsa-miR-139-3p	-0.385805	0.000230792	0.000433242	0.176955	1.08183e-06	2.52427e-06	PRAD
HNRNPC	hsa-miR-330-3p	-0.54767	6.43417e-08	1.72114e-07	0.176955	1.08183e-06	2.52427e-06	PRAD
HNRNPC	hsa-miR-455-5p	-0.470997	0.000113055	0.000216016	0.176955	1.08183e-06	2.52427e-06	PRAD
HNRNPC	hsa-miR-299-5p	-0.28824	0.006208	0.00948936	0.176955	1.08183e-06	2.52427e-06	PRAD
RBM15B	hsa-miR-542-3p	-0.318577	0.0101936	0.0147394	0.409859	4.42738e-16	3.14831e-15	PRAD
RBM15B	hsa-miR-222-3p	-0.860549	3.67627e-13	1.40486e-12	0.409859	4.42738e-16	3.14831e-15	PRAD
RBM15B	hsa-miR-758-3p	-0.291995	0.0201087	0.0272359	0.409859	4.42738e-16	3.14831e-15	PRAD
WTAP	hsa-miR-23a-3p	-0.397387	2.1168e-07	5.3928e-07	0.142639	0.0143807	0.0201329	PRAD
WTAP	hsa-miR-378c	-0.891876	1.12145e-09	3.42844e-09	0.142639	0.0143807	0.0201329	PRAD
WTAP	hsa-miR-212-3p	-0.760868	2.85281e-06	5.9853e-06	0.142639	0.0143807	0.0201329	PRAD
WTAP	hsa-miR-758-3p	-0.291995	0.0201087	0.0272359	0.142639	0.0143807	0.0201329	PRAD
WTAP	hsa-miR-378a-3p	-0.409779	2.06232e-06	4.50344e-06	0.142639	0.0143807	0.0201329	PRAD
WTAP	hsa-miR-542-3p	-0.318577	0.0101936	0.0147394	0.142639	0.0143807	0.0201329	PRAD
YTHDF1	hsa-miR-139-5p	-0.24894	0.0107725	0.0153688	0.192694	3.20617e-08	9.61851e-08	PRAD
YTHDF1	hsa-miR-369-3p	-0.735552	0.00213295	0.00335625	0.192694	3.20617e-08	9.61851e-08	PRAD
YTHDF2	hsa-miR-1-3p	-0.256261	0.000337373	0.000601648	0.170967	3.63726e-07	9.54782e-07	PRAD
YTHDF2	hsa-miR-493-3p	-0.715176	5.7109e-07	1.38879e-06	0.170967	3.63726e-07	9.54782e-07	PRAD
YTHDF2	hsa-miR-181c-5p	-0.20529	0.0131059	0.0184517	0.170967	3.63726e-07	9.54782e-07	PRAD
ALKBH5	hsa-miR-362-3p	1.11764	1.49236e-07	3.94209e-07	-0.238931	0.00724209	0.0113133	STAD
ALKBH5	hsa-miR-484	0.297988	0.0181738	0.0242317	-0.238931	0.00724209	0.0113133	STAD
ALKBH5	hsa-miR-320b	1.26925	1.53576e-08	5.00015e-08	-0.238931	0.00724209	0.0113133	STAD
ALKBH5	hsa-miR-615-3p	2.69717	9.2759e-08	2.59725e-07	-0.238931	0.00724209	0.0113133	STAD
ALKBH5	hsa-miR-92a-3p	1.43389	5.96961e-12	3.63368e-11	-0.238931	0.00724209	0.0113133	STAD
ALKBH5	hsa-miR-96-5p	1.68179	1.3433e-08	4.47767e-08	-0.238931	0.00724209	0.0113133	STAD
ALKBH5	hsa-miR-320c	1.12642	5.37081e-06	1.17487e-05	-0.238931	0.00724209	0.0113133	STAD
CBLL1	hsa-miR-144-3p	-0.886215	0.00308427	0.00464299	0.213932	0.00110086	0.0019265	STAD
CBLL1	hsa-miR-203a-3p	-1.08331	0.00538666	0.00785555	0.213932	0.00110086	0.0019265	STAD
EIF3A	hsa-miR-26a-5p	-0.414073	0.00969712	0.0136809	0.336285	6.59974e-06	1.73243e-05	STAD
EIF3A	hsa-miR-497-5p	-0.644365	0.00295077	0.0044903	0.336285	6.59974e-06	1.73243e-05	STAD
EIF3A	hsa-let-7c-5p	-0.415213	0.0121379	0.0168248	0.336285	6.59974e-06	1.73243e-05	STAD
EIF3A	hsa-miR-195-5p	-0.82648	1.74423e-09	7.63101e-09	0.336285	6.59974e-06	1.73243e-05	STAD
HNRNPA2B1	hsa-miR-23b-3p	-0.398155	5.00004e-06	1.11112e-05	0.686444	1.47523e-15	3.09797e-14	STAD
HNRNPA2B1	hsa-miR-195-5p	-0.82648	1.74423e-09	7.63101e-09	0.686444	1.47523e-15	3.09797e-14	STAD
HNRNPA2B1	hsa-miR-326	-0.636341	0.0131745	0.0180827	0.686444	1.47523e-15	3.09797e-14	STAD
HNRNPA2B1	hsa-miR-490-3p	-2.42149	6.3767e-07	1.56621e-06	0.686444	1.47523e-15	3.09797e-14	STAD
HNRNPA2B1	hsa-miR-204-5p	-1.47324	2.44792e-09	1.00797e-08	0.686444	1.47523e-15	3.09797e-14	STAD
HNRNPA2B1	hsa-miR-27b-3p	-0.36682	2.86456e-06	6.57439e-06	0.686444	1.47523e-15	3.09797e-14	STAD
HNRNPA2B1	hsa-miR-30a-5p	-0.665021	3.62017e-07	9.05042e-07	0.686444	1.47523e-15	3.09797e-14	STAD
HNRNPA2B1	hsa-miR-497-5p	-0.644365	0.00295077	0.0044903	0.686444	1.47523e-15	3.09797e-14	STAD
HNRNPC	hsa-miR-139-3p	-1.54003	1.24755e-17	2.91094e-16	0.265249	1.31261e-05	3.06276e-05	STAD
HNRNPC	hsa-miR-30a-5p	-0.665021	3.62017e-07	9.05042e-07	0.265249	1.31261e-05	3.06276e-05	STAD
HNRNPC	hsa-miR-28-5p	-0.285646	0.000178092	0.000296819	0.265249	1.31261e-05	3.06276e-05	STAD
HNRNPC	hsa-miR-218-5p	-0.513727	2.54864e-06	5.94683e-06	0.265249	1.31261e-05	3.06276e-05	STAD
IGF2BP1	hsa-miR-29c-3p	-1.28029	9.773e-08	2.68278e-07	6.74881	3.11354e-08	1.24839e-07	STAD
IGF2BP3	hsa-miR-204-5p	-1.47324	2.44792e-09	1.00797e-08	3.30415	1.90564e-11	1.00046e-10	STAD
IGF2BP3	hsa-miR-129-5p	-0.565002	4.87697e-09	1.75071e-08	3.30415	1.90564e-11	1.00046e-10	STAD
KIAA1429	hsa-miR-133b	-2.24916	7.11543e-17	1.2452e-15	0.453928	3.82839e-07	1.14852e-06	STAD
KIAA1429	hsa-miR-218-5p	-0.513727	2.54864e-06	5.94683e-06	0.453928	3.82839e-07	1.14852e-06	STAD
KIAA1429	hsa-miR-143-3p	-1.16579	2.48309e-10	1.33705e-09	0.453928	3.82839e-07	1.14852e-06	STAD
WTAP	hsa-miR-133b	-2.24916	7.11543e-17	1.2452e-15	0.168599	0.0127363	0.0173671	STAD
WTAP	hsa-miR-23b-3p	-0.398155	5.00004e-06	1.11112e-05	0.168599	0.0127363	0.0173671	STAD
YTHDF1	hsa-miR-218-5p	-0.513727	2.54864e-06	5.94683e-06	0.779451	6.92096e-15	7.26701e-14	STAD
YTHDF1	hsa-miR-139-5p	-1.51607	9.73141e-16	1.3624e-14	0.779451	6.92096e-15	7.26701e-14	STAD
YTHDF2	hsa-miR-145-5p	-1.75734	3.5755e-13	2.63458e-12	0.224434	3.74367e-05	7.8617e-05	STAD
YTHDF2	hsa-miR-1-3p	-2.42196	2.72624e-17	5.45248e-16	0.224434	3.74367e-05	7.8617e-05	STAD
YTHDF2	hsa-miR-365a-3p	-0.779839	1.0746e-07	2.89316e-07	0.224434	3.74367e-05	7.8617e-05	STAD
YTHDF3	hsa-miR-144-3p	-0.886215	0.00308427	0.00464299	0.214307	0.0132321	0.0173671	STAD
YTHDF3	hsa-miR-30a-5p	-0.665021	3.62017e-07	9.05042e-07	0.214307	0.0132321	0.0173671	STAD
YTHDF3	hsa-miR-26a-5p	-0.414073	0.00969712	0.0136809	0.214307	0.0132321	0.0173671	STAD
EIF3A	hsa-miR-15a-5p	0.412987	1.95726e-07	6.00676e-07	-0.0853111	0.0388145	0.0407552	THCA
FTO	hsa-miR-181a-5p	1.11878	2.98661e-20	4.43014e-19	-0.377965	4.67882e-15	1.9651e-14	THCA
FTO	hsa-miR-31-5p	2.19737	1.96518e-13	8.3286e-13	-0.377965	4.67882e-15	1.9651e-14	THCA
FTO	hsa-miR-21-5p	1.56161	1.68631e-18	1.87602e-17	-0.377965	4.67882e-15	1.9651e-14	THCA
FTO	hsa-miR-135b-5p	0.203864	0.0143337	0.0219918	-0.377965	4.67882e-15	1.9651e-14	THCA
FTO	hsa-miR-181d-5p	0.825455	6.85567e-12	2.65285e-11	-0.377965	4.67882e-15	1.9651e-14	THCA
FTO	hsa-miR-33b-5p	0.838079	8.11388e-05	0.000167938	-0.377965	4.67882e-15	1.9651e-14	THCA
KIAA1429	hsa-miR-151a-5p	0.183951	0.00254848	0.00405027	-0.205938	6.03786e-08	9.37228e-08	THCA
KIAA1429	hsa-miR-338-3p	0.0770317	0.0145789	0.0219918	-0.205938	6.03786e-08	9.37228e-08	THCA
METTL14	hsa-miR-1307-3p	0.447817	1.73334e-06	4.40764e-06	-0.50121	4.37514e-20	2.29695e-19	THCA
WTAP	hsa-miR-141-3p	0.381424	0.000284447	0.000550344	-0.256549	6.24819e-08	9.37228e-08	THCA
WTAP	hsa-miR-34a-5p	1.99343	2.18825e-29	9.73771e-28	-0.256549	6.24819e-08	9.37228e-08	THCA
YTHDC1	hsa-miR-15a-5p	0.412987	1.95726e-07	6.00676e-07	-0.405512	4.45523e-21	3.11866e-20	THCA
YTHDC1	hsa-miR-34a-5p	1.99343	2.18825e-29	9.73771e-28	-0.405512	4.45523e-21	3.11866e-20	THCA
YTHDF3	hsa-miR-33b-5p	0.838079	8.11388e-05	0.000167938	-0.228753	5.08502e-08	8.89878e-08	THCA
YTHDF3	hsa-miR-135b-5p	0.203864	0.0143337	0.0219918	-0.228753	5.08502e-08	8.89878e-08	THCA
HNRNPC	hsa-miR-28-5p	-0.987343	9.78215e-30	8.70612e-28	0.198081	3.25191e-09	7.58778e-09	THCA
HNRNPC	hsa-miR-30e-5p	-0.344726	3.51932e-07	1.04406e-06	0.198081	3.25191e-09	7.58778e-09	THCA
HNRNPC	hsa-miR-30c-5p	-0.513474	9.38365e-09	3.21209e-08	0.198081	3.25191e-09	7.58778e-09	THCA
HNRNPC	hsa-miR-7-2-3p	-1.38709	2.40575e-17	1.78427e-16	0.198081	3.25191e-09	7.58778e-09	THCA
HNRNPC	hsa-miR-139-3p	-1.05049	5.48323e-18	5.4223e-17	0.198081	3.25191e-09	7.58778e-09	THCA
HNRNPC	hsa-miR-484	-0.586228	8.04676e-14	3.76927e-13	0.198081	3.25191e-09	7.58778e-09	THCA
HNRNPC	hsa-miR-186-5p	-0.481428	4.97952e-14	2.4621e-13	0.198081	3.25191e-09	7.58778e-09	THCA
HNRNPC	hsa-miR-30a-5p	-0.600638	1.91768e-15	1.06671e-14	0.198081	3.25191e-09	7.58778e-09	THCA
IGF2BP1	hsa-miR-24-3p	-0.260999	6.54598e-06	1.53314e-05	0.0441374	8.51368e-06	1.11742e-05	THCA
IGF2BP1	hsa-let-7c-5p	-0.56541	5.07167e-15	2.65517e-14	0.0441374	8.51368e-06	1.11742e-05	THCA
IGF2BP1	hsa-miR-98-5p	-0.247924	1.34537e-06	3.5217e-06	0.0441374	8.51368e-06	1.11742e-05	THCA
IGF2BP1	hsa-miR-491-5p	-0.417462	1.20381e-05	2.74716e-05	0.0441374	8.51368e-06	1.11742e-05	THCA
IGF2BP1	hsa-let-7d-5p	-0.212668	2.42801e-05	5.27056e-05	0.0441374	8.51368e-06	1.11742e-05	THCA
IGF2BP1	hsa-miR-532-3p	-0.396727	8.91549e-07	2.47962e-06	0.0441374	8.51368e-06	1.11742e-05	THCA
IGF2BP2	hsa-miR-335-5p	-0.479552	2.17765e-05	4.84527e-05	1.87059	4.7624e-24	1.0001e-22	THCA
IGF2BP2	hsa-miR-98-5p	-0.247924	1.34537e-06	3.5217e-06	1.87059	4.7624e-24	1.0001e-22	THCA
IGF2BP3	hsa-miR-98-5p	-0.247924	1.34537e-06	3.5217e-06	1.03513	1.86345e-10	5.59036e-10	THCA
IGF2BP3	hsa-let-7c-5p	-0.56541	5.07167e-15	2.65517e-14	1.03513	1.86345e-10	5.59036e-10	THCA
IGF2BP3	hsa-miR-664a-5p	-0.347508	1.31038e-06	3.5217e-06	1.03513	1.86345e-10	5.59036e-10	THCA
RBM15B	hsa-miR-758-3p	-0.147308	0.000219384	0.000443753	0.0691328	0.00484509	0.0053551	THCA
RBM15B	hsa-miR-30c-5p	-0.513474	9.38365e-09	3.21209e-08	0.0691328	0.00484509	0.0053551	THCA
RBM15B	hsa-miR-144-3p	-2.26288	3.55673e-23	1.05516e-21	0.0691328	0.00484509	0.0053551	THCA
RBM15B	hsa-miR-30e-5p	-0.344726	3.51932e-07	1.04406e-06	0.0691328	0.00484509	0.0053551	THCA
RBM15B	hsa-miR-20b-5p	-1.385	6.34197e-17	4.34181e-16	0.0691328	0.00484509	0.0053551	THCA
RBM15B	hsa-miR-197-3p	-0.314275	6.02775e-06	1.44992e-05	0.0691328	0.00484509	0.0053551	THCA
RBM15B	hsa-miR-370-3p	-0.137731	0.00196841	0.00324423	0.0691328	0.00484509	0.0053551	THCA
RBM15B	hsa-miR-30a-5p	-0.600638	1.91768e-15	1.06671e-14	0.0691328	0.00484509	0.0053551	THCA
RBM15B	hsa-miR-128-3p	-0.289494	0.00102351	0.00179724	0.0691328	0.00484509	0.0053551	THCA
RBM15B	hsa-miR-582-5p	-0.574662	0.000839212	0.00156871	0.0691328	0.00484509	0.0053551	THCA
ALKBH5	hsa-miR-193b-3p	1.39296	1.4459e-08	3.22546e-08	-0.249535	0.00466844	0.00653581	UCEC
CBLL1	hsa-miR-203a-3p	3.71089	2.03228e-15	1.04005e-14	-0.240223	0.00178485	0.00267728	UCEC
FTO	hsa-miR-23a-3p	1.14596	3.02177e-11	8.21545e-11	-1.04415	2.22716e-13	4.67704e-12	UCEC
FTO	hsa-miR-590-5p	1.45911	1.379e-11	3.8701e-11	-1.04415	2.22716e-13	4.67704e-12	UCEC
FTO	hsa-miR-31-5p	2.69864	0.000250617	0.000403772	-1.04415	2.22716e-13	4.67704e-12	UCEC
FTO	hsa-miR-215-5p	3.62524	2.72595e-15	1.31754e-14	-1.04415	2.22716e-13	4.67704e-12	UCEC
FTO	hsa-miR-30c-5p	0.809137	1.48775e-05	2.58869e-05	-1.04415	2.22716e-13	4.67704e-12	UCEC
FTO	hsa-miR-130a-5p	0.903035	0.000595791	0.000925603	-1.04415	2.22716e-13	4.67704e-12	UCEC
FTO	hsa-miR-186-5p	1.05713	1.2105e-11	3.51045e-11	-1.04415	2.22716e-13	4.67704e-12	UCEC
FTO	hsa-miR-135b-5p	3.33724	1.93222e-14	8.00491e-14	-1.04415	2.22716e-13	4.67704e-12	UCEC
FTO	hsa-miR-30b-5p	0.362869	0.0303965	0.0413203	-1.04415	2.22716e-13	4.67704e-12	UCEC
FTO	hsa-miR-33b-5p	1.99122	9.06125e-09	2.07455e-08	-1.04415	2.22716e-13	4.67704e-12	UCEC
FTO	hsa-miR-30d-5p	0.690576	2.95717e-05	5.04458e-05	-1.04415	2.22716e-13	4.67704e-12	UCEC
FTO	hsa-miR-30c-2-3p	1.05213	0.0198701	0.0278822	-1.04415	2.22716e-13	4.67704e-12	UCEC
FTO	hsa-miR-21-5p	1.54029	4.28381e-14	1.69405e-13	-1.04415	2.22716e-13	4.67704e-12	UCEC
FTO	hsa-miR-155-5p	2.66188	4.57976e-14	1.73235e-13	-1.04415	2.22716e-13	4.67704e-12	UCEC
FTO	hsa-miR-30b-3p	0.954037	8.71093e-06	1.54663e-05	-1.04415	2.22716e-13	4.67704e-12	UCEC
KIAA1429	hsa-miR-107	1.90613	1.46706e-17	1.16031e-16	-0.213899	0.00639104	0.00838824	UCEC
KIAA1429	hsa-miR-10a-5p	1.6257	2.24769e-07	4.65594e-07	-0.213899	0.00639104	0.00838824	UCEC
KIAA1429	hsa-miR-340-5p	1.41471	1.15106e-12	3.70896e-12	-0.213899	0.00639104	0.00838824	UCEC
KIAA1429	hsa-miR-151a-5p	1.62324	1.07508e-16	6.68087e-16	-0.213899	0.00639104	0.00838824	UCEC
METTL14	hsa-miR-30b-3p	0.954037	8.71093e-06	1.54663e-05	-0.718089	7.26219e-09	3.05012e-08	UCEC
METTL14	hsa-miR-455-3p	0.174815	5.10983e-05	8.54914e-05	-0.718089	7.26219e-09	3.05012e-08	UCEC
METTL14	hsa-miR-1307-3p	3.4669	1.50445e-20	6.63418e-19	-0.718089	7.26219e-09	3.05012e-08	UCEC
METTL14	hsa-miR-23a-5p	1.53736	1.57282e-07	3.33744e-07	-0.718089	7.26219e-09	3.05012e-08	UCEC
METTL14	hsa-miR-30c-2-3p	1.05213	0.0198701	0.0278822	-0.718089	7.26219e-09	3.05012e-08	UCEC
YTHDC1	hsa-miR-550a-5p	1.77603	2.98421e-13	1.0385e-12	-0.535732	3.13072e-09	1.64363e-08	UCEC
YTHDC1	hsa-miR-1266-5p	3.01353	1.40548e-16	8.15177e-16	-0.535732	3.13072e-09	1.64363e-08	UCEC
YTHDC1	hsa-miR-22-5p	1.49004	3.93932e-11	1.03855e-10	-0.535732	3.13072e-09	1.64363e-08	UCEC
YTHDC1	hsa-miR-20b-5p	4.33972	5.42897e-13	1.81662e-12	-0.535732	3.13072e-09	1.64363e-08	UCEC
YTHDC1	hsa-miR-34a-5p	1.00135	4.01814e-06	7.43783e-06	-0.535732	3.13072e-09	1.64363e-08	UCEC
YTHDF3	hsa-miR-30b-5p	0.362869	0.0303965	0.0413203	-0.287322	0.00085135	0.00137526	UCEC
YTHDF3	hsa-miR-30c-5p	0.809137	1.48775e-05	2.58869e-05	-0.287322	0.00085135	0.00137526	UCEC
YTHDF3	hsa-miR-106a-5p	3.43872	8.30662e-16	4.51672e-15	-0.287322	0.00085135	0.00137526	UCEC
YTHDF3	hsa-miR-20b-5p	4.33972	5.42897e-13	1.81662e-12	-0.287322	0.00085135	0.00137526	UCEC
YTHDF3	hsa-miR-130a-5p	0.903035	0.000595791	0.000925603	-0.287322	0.00085135	0.00137526	UCEC
YTHDF3	hsa-miR-33a-5p	0.717658	0.00168105	0.00247883	-0.287322	0.00085135	0.00137526	UCEC
YTHDF3	hsa-miR-142-5p	1.94273	1.28125e-10	3.2785e-10	-0.287322	0.00085135	0.00137526	UCEC
YTHDF3	hsa-miR-106b-5p	2.18865	1.80179e-18	2.20011e-17	-0.287322	0.00085135	0.00137526	UCEC
YTHDF3	hsa-miR-181d-5p	1.51023	2.20425e-06	4.16891e-06	-0.287322	0.00085135	0.00137526	UCEC
YTHDF3	hsa-miR-135b-5p	3.33724	1.93222e-14	8.00491e-14	-0.287322	0.00085135	0.00137526	UCEC
YTHDF3	hsa-miR-33b-5p	1.99122	9.06125e-09	2.07455e-08	-0.287322	0.00085135	0.00137526	UCEC
YTHDF3	hsa-miR-30d-5p	0.690576	2.95717e-05	5.04458e-05	-0.287322	0.00085135	0.00137526	UCEC
YTHDF3	hsa-miR-98-5p	1.17581	1.08364e-14	4.71384e-14	-0.287322	0.00085135	0.00137526	UCEC
ZC3H13	hsa-miR-130a-5p	0.903035	0.000595791	0.000925603	-0.583212	3.12859e-06	8.21256e-06	UCEC
ZC3H13	hsa-miR-374b-3p	0.611163	0.00111044	0.00167645	-0.583212	3.12859e-06	8.21256e-06	UCEC
HNRNPC	hsa-miR-139-3p	-2.1144	8.10363e-18	7.05016e-17	0.243968	0.000318081	0.000556641	UCEC
IGF2BP1	hsa-miR-129-5p	-0.49749	0.0352144	0.0471331	5.78644	1.65311e-05	3.85725e-05	UCEC
YTHDF1	hsa-miR-376c-3p	-0.965181	1.80518e-06	3.49001e-06	0.434487	1.35894e-07	4.07681e-07	UCEC

## Sheet: Table S4
Table S4. miRNA-m6A regulator pairs occurred in more than four cancer types.
miRNA	gene	cancer number
hsa-miR-139	HNRNPC	8
hsa-miR-1	HNRNPC	7
hsa-miR-30a	HNRNPC	7
hsa-miR-1307	METTL14	7
hsa-miR-139	YTHDF1	7
hsa-miR-96	ALKBH5	6
hsa-miR-21	FTO	6
hsa-miR-195	HNRNPA2B1	6
hsa-miR-326	HNRNPA2B1	6
hsa-miR-218	HNRNPC	6
hsa-miR-15a	EIF3A	5
hsa-miR-30d	FTO	5
hsa-let-7c	HNRNPA2B1	5
hsa-let-7b	IGF2BP1	5
hsa-let-7c	IGF2BP3	5

## Sheet: Table S5
Table S5. Pan-cancer DMP-gene regulatory pairs with negative correlation.
geneID	dnaprobe	deltaBeta	logFC.T.N._mean	p-value	FDR	type
IGF2BP2	cg12781915	0.0983803	-0.510639	2.20852e-30	9.2758e-30	BRCA
METTL14	cg25149510	0.0902809	-0.341271	2.97802e-16	7.81731e-16	BRCA
METTL14	cg20805999	0.0522408	-0.341271	2.97802e-16	7.81731e-16	BRCA
METTL14	cg00604539	0.00456354	-0.341271	2.97802e-16	7.81731e-16	BRCA
WTAP	cg10698098	0.00156005	-0.205172	4.1341e-11	8.68161e-11	BRCA
WTAP	cg17212720	0.00172896	-0.205172	4.1341e-11	8.68161e-11	BRCA
WTAP	cg21981379	0.0583407	-0.205172	4.1341e-11	8.68161e-11	BRCA
YTHDC1	cg18694877	0.00604277	-0.168959	6.92747e-07	1.32252e-06	BRCA
HNRNPA2B1	cg13351698	-0.00135068	0.561678	2.66723e-40	5.60119e-39	BRCA
HNRNPA2B1	cg12647142	-0.00193631	0.561678	2.66723e-40	5.60119e-39	BRCA
HNRNPA2B1	cg17545334	-0.0064884	0.561678	2.66723e-40	5.60119e-39	BRCA
IGF2BP3	cg07297397	-0.0071646	2.18609	0.0304829	0.0439763	BRCA
IGF2BP3	cg22545138	-0.0596279	2.18609	0.0304829	0.0439763	BRCA
IGF2BP3	cg20265043	-0.0058141	2.18609	0.0304829	0.0439763	BRCA
KIAA1429	cg03769349	-0.00103401	0.450604	6.00526e-05	0.000105092	BRCA
KIAA1429	cg22986488	-0.00405606	0.450604	6.00526e-05	0.000105092	BRCA
METTL14	cg20805999	0.0626581	-0.0835549	0.0136027	0.0178535	HNSC
METTL14	cg00604539	0.167465	-0.0835549	0.0136027	0.0178535	HNSC
RBM15B	cg15821095	0.15081	-0.29762	1.96006e-07	6.66559e-07	HNSC
YTHDC1	cg01804429	0.133625	-0.143358	0.000976932	0.00170963	HNSC
YTHDC1	cg18694877	0.0624163	-0.143358	0.000976932	0.00170963	HNSC
YTHDC1	cg24978424	0.00212831	-0.143358	0.000976932	0.00170963	HNSC
YTHDC1	cg04094193	0.0956733	-0.143358	0.000976932	0.00170963	HNSC
YTHDC1	cg04676463	0.00380496	-0.143358	0.000976932	0.00170963	HNSC
HNRNPA2B1	cg03711622	-0.00497228	0.371462	8.54285e-09	3.588e-08	HNSC
IGF2BP2	cg12781915	-0.0879504	2.42436	3.64633e-18	3.82865e-17	HNSC
IGF2BP2	cg15487251	-0.0130693	2.42436	3.64633e-18	3.82865e-17	HNSC
IGF2BP3	cg08939418	-0.0029218	2.29353	1.49395e-12	1.04577e-11	HNSC
RBM15	cg02099053	-0.211602	0.360129	1.51884e-05	3.18957e-05	HNSC
HNRNPA2B1	cg03711622	0.00152995	-0.108762	0.000783561	0.00126575	KIRC
HNRNPA2B1	cg17671317	0.00075442	-0.108762	0.000783561	0.00126575	KIRC
HNRNPA2B1	cg12647142	0.00187926	-0.108762	0.000783561	0.00126575	KIRC
HNRNPA2B1	cg17545334	0.00186162	-0.108762	0.000783561	0.00126575	KIRC
IGF2BP2	cg18234011	0.00422398	-1.04798	6.91068e-23	1.45124e-21	KIRC
IGF2BP2	cg15487251	0.0767542	-1.04798	6.91068e-23	1.45124e-21	KIRC
METTL14	cg20805999	0.0321207	-0.284681	2.5112e-09	6.5919e-09	KIRC
YTHDF2	cg21735376	0.188887	-0.0626354	0.0111897	0.0156656	KIRC
IGF2BP3	cg12601843	-0.0298547	2.64365	4.25314e-08	9.924e-08	KIRC
IGF2BP3	cg02860543	-0.039434	2.64365	4.25314e-08	9.924e-08	KIRC
WTAP	cg10698098	-0.0930058	0.343501	6.51489e-12	1.95447e-11	KIRC
METTL14	cg01729388	0.163718	-0.449238	1.95832e-09	6.85412e-09	LIHC
YTHDC1	cg24701966	0.012957	-0.221484	1.49758e-06	2.85901e-06	LIHC
YTHDC1	cg16655724	0.00107997	-0.221484	1.49758e-06	2.85901e-06	LIHC
YTHDF2	cg21735376	0.185795	-0.128655	0.0251339	0.0310478	LIHC
YTHDF2	cg13242658	0.00447704	-0.128655	0.0251339	0.0310478	LIHC
YTHDF2	cg20388635	0.00228258	-0.128655	0.0251339	0.0310478	LIHC
YTHDF2	cg25273602	0.195632	-0.128655	0.0251339	0.0310478	LIHC
CBLL1	cg07614064	-0.00778313	0.399955	2.99826e-06	4.84334e-06	LIHC
IGF2BP3	cg07297397	-0.00282515	4.12764	2.59127e-13	1.81389e-12	LIHC
IGF2BP3	cg08939418	-0.0793852	4.12764	2.59127e-13	1.81389e-12	LIHC
IGF2BP3	cg02860543	-0.0442411	4.12764	2.59127e-13	1.81389e-12	LIHC
METTL14	cg20805999	0.103229	-0.245949	3.65168e-09	9.58565e-09	LUAD
WTAP	cg21981379	0.0838021	-0.260056	4.85593e-07	9.27041e-07	LUAD
WTAP	cg20372956	0.0504476	-0.260056	4.85593e-07	9.27041e-07	LUAD
IGF2BP3	cg07297397	-0.00651751	3.76555	5.81031e-13	2.44033e-12	LUAD
YTHDF2	cg20388635	-0.149989	0.158204	0.00126008	0.00203551	LUAD
YTHDF2	cg20003805	-0.153036	0.158204	0.00126008	0.00203551	LUAD
CBLL1	cg15056119	0.00163197	-0.0970522	0.0110798	0.0166197	PRAD
CBLL1	cg26385438	0.00211024	-0.0970522	0.0110798	0.0166197	PRAD
CBLL1	cg25183958	0.00116456	-0.0970522	0.0110798	0.0166197	PRAD
HNRNPA2B1	cg11010242	-0.0175186	0.362451	4.49759e-16	3.14831e-15	PRAD
HNRNPA2B1	cg17671317	-0.00620858	0.362451	4.49759e-16	3.14831e-15	PRAD
HNRNPA2B1	cg17545334	-0.0080255	0.362451	4.49759e-16	3.14831e-15	PRAD
RBM15B	cg15821095	-0.110717	0.409859	4.42738e-16	3.14831e-15	PRAD
YTHDC2	cg25604984	-0.0077949	0.221127	0.000632889	0.00110756	PRAD
RBM15	cg15357661	0.0613323	-0.666276	1.22278e-21	1.28392e-20	THCA
IGF2BP2	cg12781915	-0.00290974	1.87059	4.7624e-24	1.0001e-22	THCA
RBM15B	cg07867023	-0.0214186	0.0691328	0.00484509	0.0053551	THCA
METTL14	cg00604539	0.144916	-0.294301	9.17663e-11	3.21182e-10	COAD
METTL14	cg20805999	0.0016484	-0.294301	9.17663e-11	3.21182e-10	COAD
IGF2BP2	cg12781915	-0.0817543	0.523733	8.43291e-06	1.36224e-05	COAD
YTHDF2	cg20003805	-0.111609	0.139529	0.000687959	0.000902946	COAD
YTHDF2	cg03375056	-0.150165	0.139529	0.000687959	0.000902946	COAD
METTL14	cg00604539	0.0981767	-0.565866	2.5073e-12	5.26533e-11	KIRP
METTL14	cg20805999	0.118702	-0.565866	2.5073e-12	5.26533e-11	KIRP
METTL14	cg01729388	0.00365922	-0.565866	2.5073e-12	5.26533e-11	KIRP
RBM15	cg05807672	0.0224158	-0.205667	0.00551573	0.0082736	KIRP
RBM15	cg15881119	0.0211902	-0.205667	0.00551573	0.0082736	KIRP
RBM15	cg17482391	0.0461912	-0.205667	0.00551573	0.0082736	KIRP
YTHDF2	cg07397372	0.00536888	-0.236382	1.25392e-06	3.99684e-06	KIRP
METTL14	cg20805999	0.00223947	-0.404639	3.36855e-14	8.84245e-14	LUSC
METTL14	cg07243656	0.00459657	-0.404639	3.36855e-14	8.84245e-14	LUSC
METTL14	cg01729388	0.00938575	-0.404639	3.36855e-14	8.84245e-14	LUSC
METTL14	cg25149510	0.00354528	-0.404639	3.36855e-14	8.84245e-14	LUSC
EIF3A	cg04126427	-0.0560477	0.212483	0.00323704	0.00485556	LUSC
IGF2BP3	cg27135125	-0.0274783	4.96139	1.13623e-25	2.38608e-24	LUSC
RBM15	cg02099053	-0.324652	0.261943	0.000175514	0.00030715	LUSC
RBM15	cg15881119	-0.16267	0.261943	0.000175514	0.00030715	LUSC
METTL14	cg01729388	0.191659	-0.718089	7.26219e-09	3.05012e-08	UCEC
WTAP	cg21981379	0.133569	-0.217921	0.00724349	0.00894784	UCEC
IGF2BP3	cg07297397	-0.0225417	4.82326	2.02738e-10	2.12875e-09	UCEC
IGF2BP3	cg22826239	-0.00150243	4.82326	2.02738e-10	2.12875e-09	UCEC
IGF2BP3	cg22545138	-0.00665627	4.82326	2.02738e-10	2.12875e-09	UCEC
RBM15	cg20311544	-0.0837649	0.723302	3.64447e-10	2.55113e-09	UCEC
RBM15	cg19317012	-0.0367781	0.723302	3.64447e-10	2.55113e-09	UCEC
YTHDF2	cg03731740	-0.0524216	0.458848	2.78905e-08	9.76169e-08	UCEC
YTHDF2	cg03375056	-0.0931702	0.458848	2.78905e-08	9.76169e-08	UCEC
YTHDF2	cg20388635	-0.198914	0.458848	2.78905e-08	9.76169e-08	UCEC
YTHDF2	cg21735376	-0.0087668	0.458848	2.78905e-08	9.76169e-08	UCEC
YTHDF2	cg25273602	-0.128352	0.458848	2.78905e-08	9.76169e-08	UCEC

## Sheet: Table S6
Table S6. DNA methylation-m6A regulator pairs occurred in more than two cancer types.
probe	gene	cancer number
cg20805999	METTL14	7
cg12781915	IGF2BP2	4
cg07297397	IGF2BP3	4
cg00604539	METTL14	4
cg01729388	METTL14	4
cg17545334	HNRNPA2B1	3
cg21981379	WTAP	3
cg20388635	YTHDF2	3
cg21735376	YTHDF2	3

## Sheet: Table S7
Table S7. Correlation between m6A regulators’ expression and 28 immune cell infiltration scores in KIRC.
geneID	genesets	KIRC-T-r	KIRC-T-p	KIRC-T-n	class
METTL14	Activated CD8 T cell	-0.403245	0	529	negative_sig
METTL14	Activated dendritic cell	-0.302087	1.26521e-12	529	negative_sig
METTL14	CD56bright natural killer cell	-0.364149	0	529	negative_sig
METTL14	Central memory CD4 T cell	-0.482818	0	529	negative_sig
YTHDC1	Activated CD8 T cell	-0.303039	1.06715e-12	529	negative_sig
YTHDC1	CD56bright natural killer cell	-0.433393	0	529	negative_sig
YTHDC1	Gamma delta T cell	-0.316192	9.54792e-14	529	negative_sig
CBLL1	Activated CD8 T cell	-0.32821	9.32587e-15	529	negative_sig
CBLL1	Central memory CD4 T cell	-0.338706	1.11022e-15	529	negative_sig
YTHDF3	CD56dim natural killer cell	-0.30918	3.5083e-13	529	negative_sig
KIAA1429	CD56bright natural killer cell	-0.320898	3.90799e-14	529	negative_sig
KIAA1429	CD56dim natural killer cell	-0.404774	0	529	negative_sig
EIF3A	Activated CD8 T cell	-0.332601	3.9968e-15	529	negative_sig
EIF3A	CD56dim natural killer cell	-0.301323	1.44951e-12	529	negative_sig
EIF3A	Central memory CD4 T cell	-0.314736	1.25233e-13	529	negative_sig
ZC3H13	Activated CD8 T cell	-0.338004	1.33227e-15	529	negative_sig
ZC3H13	CD56bright natural killer cell	-0.328887	8.21565e-15	529	negative_sig
ZC3H13	CD56dim natural killer cell	-0.395503	0	529	negative_sig
ZC3H13	Central memory CD4 T cell	-0.344902	4.44089e-16	529	negative_sig
METTL3	Gamma delta T cell	-0.376126	0	529	negative_sig
METTL3	Immature dendritic cell	-0.316161	9.59233e-14	529	negative_sig
RBM15	Eosinophil	0.302412	1.19393e-12	529	positive_sig
RBM15	Memory B cell	0.307733	4.56968e-13	529	positive_sig
RBM15	Regulatory T cell	0.308665	3.85469e-13	529	positive_sig
IGF2BP3	Activated CD4 T cell	0.539252	0	529	positive_sig
IGF2BP3	Activated CD8 T cell	0.370776	0	529	positive_sig
IGF2BP3	Activated dendritic cell	0.377672	0	529	positive_sig
IGF2BP3	Central memory CD4 T cell	0.357247	0	529	positive_sig
IGF2BP3	Central memory CD8 T cell	0.419254	0	529	positive_sig
IGF2BP3	Gamma delta T cell	0.388608	0	529	positive_sig
IGF2BP3	Macrophage	0.326478	1.33227e-14	529	positive_sig
IGF2BP3	MDSC	0.386794	0	529	positive_sig
IGF2BP3	Natural killer T cell	0.318546	6.12843e-14	529	positive_sig
IGF2BP3	T follicular helper cell	0.335256	2.22045e-15	529	positive_sig
IGF2BP3	Type 1 T helper cell	0.379255	0	529	positive_sig
CBLL1	Memory B cell	0.317052	8.12683e-14	529	positive_sig
KIAA1429	Central memory CD8 T cell	0.344413	4.44089e-16	529	positive_sig
KIAA1429	Regulatory T cell	0.310282	2.8666e-13	529	positive_sig
KIAA1429	Type 2 T helper cell	0.366266	0	529	positive_sig
EIF3A	Memory B cell	0.309041	3.59934e-13	529	positive_sig
ZC3H13	Type 2 T helper cell	0.33448	2.66454e-15	529	positive_sig
FTO	Memory B cell	0.31136	2.34923e-13	529	positive_sig
